1 **Transcriptomic basis and evolution of the ant social interactome**

2

3 Michael R. Warner<sup>1</sup>, Alexander S. Mikheyev<sup>2,3</sup>, Timothy A. Linksvayer<sup>1</sup>

4

5 <sup>1</sup>University of Pennsylvania, Philadelphia, Pennsylvania, USA

6 <sup>2</sup>Okinawa Institute of Science and Technology, Okinawa, Japan

7 <sup>3</sup>Research School of Biology, Australian National University, Canberra, Australia

8

9

10

11

12

13

14

15

16

17

18

19

20

21

22

23

24

25

## 26 **Abstract**

27 Social interactions are a fundamental feature of life for most organisms. Organismal development is often  
28 strongly regulated by interactions among close relatives, yet little is known about how genes expressed in  
29 social partners indirectly affect developmental trajectories and trait expression. In eusocial insects, social  
30 interactions between caregiving worker nurses and larvae strictly regulate larval development and  
31 resultant adult phenotypes. Here, we study the social interactome regulating larval development by  
32 collecting and sequencing interacting nurses and larvae across a time course of larval development. First,  
33 we find that the majority of nurse and larval transcriptomes exhibit parallel expression dynamics across  
34 larval development, providing a strong transcriptomic signature of the social interactome regulating larval  
35 development. Next, we leverage this widespread nurse-larva gene co-expression to infer social gene  
36 regulatory networks acting between nurses and larvae. We find that genes with the strongest social effects  
37 tend to be peripheral elements of within-tissue regulatory networks and are often known to encode  
38 secreted proteins. For example, our data suggest that the gene *giant-lens* expressed by nurses may inhibit  
39 larval epidermal growth factor signaling, which is known to affect various aspects of insect development,  
40 including caste in honey bees. Finally, we find that genes recruited for social regulatory processes tend to  
41 be relatively evolutionarily young and tend to experience relaxed selective constraint. Overall, our study  
42 provides a first glimpse into the molecular details and evolutionary features of the social mechanisms that  
43 regulate all aspects of life in eusocial insects.

44

## 45 **Author Summary**

46 From single-celled bacteria to complex plants and animals, most organisms experience and are strongly  
47 impacted by social interactions. Despite their obvious importance, little is known about the genetic basis  
48 of social traits and interactions. In eusocial insects, the development of larvae is strictly regulated by  
49 caregiving nurse workers through a myriad of social interactions occurring across larval development. In  
50 this paper, we study ant nurse-larva social interactions and the effect of interactions on gene expression

51 by simultaneously collecting and sequencing interacting nurses and larvae across larval development. We  
52 find that broad-scale gene expression patterns reflect ongoing social interactions. Based on nurse-larva  
53 gene co-expression, we identify genes expressed in nurses that exhibit strong putative effects on the  
54 expression of genes in larvae. Interestingly, such genes with strong social roles tend to be less important  
55 for pathways operating within individuals, and such highly social genes tend to experience relatively  
56 weaker natural selection in comparison to less social genes. This suggests that genes underlying social  
57 traits are characterized by distinct evolutionary and network features. Overall, this study represents a  
58 significant advance in our understanding of the intersection of genetics, behavior, and evolution.

59

## 60 **Introduction**

61 Social interactions play a prominent role in the lives of nearly all organisms [1] and strongly affect trait  
62 expression as well as fitness [2–4]. Social interactions in the context of development (e.g. parental care)  
63 often strongly regulate developmental trajectories and resultant adult phenotypes, for example via  
64 generationally-transferred compounds such as milk in mammals [5,6], milk-like secretions in arthropods  
65 [7,8], and other forms of nutritional provisioning [9,10]. In many taxa including certain birds, mammals,  
66 and insects, care for offspring and the regulation of offspring development has shifted at least in part from  
67 parents to adult siblings, who perform alloparental care [11]. In eusocial insect societies, sterile nurse  
68 workers strictly regulate the development of their larval siblings by modulating the quantity and quality of  
69 nourishment larvae receive [12–14], as well as through the direct transfer of growth-regulating hormones  
70 and proteins [15,16]. At the same time, larvae manipulate nurse provisioning behavior via pheromones  
71 [17–20] and begging behavior [21,22].

72 In general, traits such as caregiving behavior that are defined or influenced by social interactions  
73 are the property of the genomes of multiple interacting social partners [2,14]. This has implications for  
74 both the mechanistic (e.g., molecular) underpinnings of development and trait expression as well as the  
75 genetic basis of trait variation at the population level -- i.e. how allelic variation in the genomes of  
76 interacting social partners affects trait variation [2,14]. Furthermore, because social traits are expressed in

77 one individual but impact the fitness of other individuals, social behavior and socially-influenced traits  
78 experience distinct forms of selection, including kin selection and social selection [23,24]. Altogether,  
79 these distinct genetic features and patterns of selection are often thought to lead to distinct evolutionary  
80 features, such as rapid evolutionary dynamics in comparison to other traits [25–27]. In eusocial insects,  
81 previous studies show that variation in larval developmental trajectories and ultimate adult phenotypes  
82 (including reproductive caste, body size, etc.) depends on the combination of larval and nurse genotypes  
83 [28–34]. However, the identity of specific genes and molecular pathways that are functionally involved in  
84 the expression of social interactions (e.g., genes underlying nurse and larval traits affecting nurse-larva  
85 interactions), and patterns of molecular evolution for these genes, have remained less well studied  
86 [15,16,35,36].

87 Transcriptomic studies are often used to identify sets of genes underlying the expression of  
88 particular traits by performing RNA-sequencing on individuals that vary in the expression of such traits.  
89 For example, in social insects, recent studies have compared the transcriptomes of workers that perform  
90 nursing versus foraging tasks [37–39], or nurses feeding larvae of different stages or castes [35,40].  
91 However, given the phenotypic co-regulation known to occur between interacting social partners (here,  
92 nurses and larvae), it is likely that genes expressed in one social partner affect the expression of genes in  
93 the other social partner, and vice-versa, such that interacting social partners are connected by “social”  
94 gene regulatory networks [14,32,41,42]. Thus, identifying the genes important for *social interactions* such  
95 as nurse-larva interactions is only possible by studying the transcriptomic dynamics of both interacting  
96 social partners across a time series of interactions. Similarly, host-symbiont interactions result in gene  
97 regulation between interacting partners, and recent studies have sought to reconstruct gene regulatory  
98 networks acting between hosts and symbionts by collecting and profiling the transcriptomes of each social  
99 partner across a time series of interactions [43–47].

100 Here, we use analogous methodology to study transcriptomic signatures of nurse-larva  
101 interactions in the pharaoh ant, *Monomorium pharaonis*. We sample a developmental time series of larvae  
102 as well as the nurses that feed each larval stage in this series, collecting individuals at the moment of

103 interaction in order to identify genes involved in the expression of nurse-larva interactions, as well as  
104 genes affected by these interactions (i.e. the full “social interactome” [14]). Given that pharaoh ant nurses  
105 tend to specialize on feeding young versus old larvae and nurses feeding young versus old larvae show  
106 different transcriptomic profiles [40], and larval transcriptomic profiles also change over development  
107 [48,49], we predicted that if nurse-larva interactions have functional implications as described above, we  
108 would observe concerted changes in broad-scale gene expression in larvae and their nurses across larval  
109 development (Fig 1). Based on our dual RNA-seq data, we infer social gene regulatory networks acting  
110 between nurses and larvae to identify genes predicted to have important social regulatory effects. Finally,  
111 we combine our measures of social regulatory effects with available population genomic data [48] to  
112 characterize the patterns of molecular evolution of genes underlying nurse-larva interactions.

113

## 114 **Results**

### 115 *Transcriptome-wide signatures of nurse-larva co-expression across larval development*

116 To elucidate transcriptomic signatures of nurse-larva interactions, we performed RNA-sequencing on  
117 worker-destined larvae across five developmental stages and nurses that fed larvae of each developmental  
118 stage (termed “stage-specific” nurses; see Fig S1 for sampling scheme, Table S1 for list of samples),  
119 building upon a previously published dataset focused on caste development in *M. pharaonis* [48]. We  
120 hypothesized that if genes expressed in larvae regulate the expression of genes in nurse and vice versa, we  
121 would observe correlated expression profiles across development in larvae and nurses (Fig 1). As a  
122 biological control, we also collected “random nurses” that we observed feeding any stage of larvae in the  
123 colony, and hence would not be expected to show correlated expression dynamics with larvae across the  
124 five larval developmental stages. We also concurrently collected reproductive-destined larvae across the  
125 last four developmental stages (reproductive-destined larvae can only be identified after the first larval  
126 stage [50]), but unless clearly stated otherwise, all analyses were conducted only on worker-destined  
127 larvae. To minimize experimental variance, we pooled ten individuals per sample. We sequenced whole  
128 bodies of larvae but separated nurse heads and abdomens prior to sequencing.

129 We grouped genes into co-expression profiles or “modules” using an algorithm designed to  
130 characterize gene co-expression dynamics across a short time series [51]. Each module represents a  
131 standardized pre-defined expression profile, consisting of five values that each represent the log<sub>2</sub> fold-  
132 change between the given developmental stage and the initial stage (see Fig S2; this results in a total of 81  
133 possible modules). We sorted genes into the module that most closely represented their expression profile  
134 by Pearson correlation. We identified modules containing a greater than expected number of genes, where  
135 we formed null expectations using permutation tests across developmental stage [51]. We identified such  
136 significantly-enriched modules separately for larvae, stage-specific nurse heads, stage-specific nurse  
137 abdomens, random nurse heads, and random nurse abdomens. We focused on both parallel (i.e. positive  
138 regulation or activation) and anti-parallel (i.e. inhibitory) correlated expression patterns by identifying  
139 significantly-enriched modules that were shared in both larvae and nurses (parallel), as well as  
140 significantly-enriched modules for which the inverse of the module was identified as significantly-  
141 enriched in the social partner (anti-parallel).

142 Larvae and stage-specific nurses shared many significantly-enriched modules (Table S2). These  
143 modules contained the majority of genes expressed in nurses (stage-specific nurse head: 65%; abdomen:  
144 76%) and a substantial proportion of the larval transcriptome (shared with stage-specific nurse head: 22%;  
145 abdomen: 60%), such that there was a general widespread signature of correlated transcriptional patterns  
146 between stage-specific nurses and larvae across larval development (Fig 2A-D). These coordinated  
147 dynamics were dominated by parallel associations in nurse abdomens (possibly reflecting shared  
148 metabolic pathways) but anti-parallel associations in nurse heads (possibly reflecting the social regulation  
149 of larval growth). In contrast to stage-specific nurses, random nurses (our biological control) shared few  
150 significantly-enriched modules with larvae (Table S2), and modules shared between random nurses and  
151 larvae contained significantly fewer genes than modules shared between stage-specific nurses and larvae  
152 (Fig 2E).

153

154 *Identification of genes putatively involved in social interactions*

155 Given that we observed transcriptome-wide patterns consistent with nurse-larva transcriptional co-  
156 regulation across larval development, we next identified the genes that might be driving these patterns  
157 (see Fig S3). We performed differential expression analysis to identify genes that varied in larval  
158 expression according to larval developmental stage, as well as genes that varied in nurse expression  
159 according to the developmental stage of larvae they fed. We identified 8125 differentially expressed  
160 genes (DEGs) in larvae (78% of 10446 total genes). We identified 2057 and 1408 DEGs in stage-specific  
161 nurse heads and abdomens, respectively, compared to 599 and 520 DEGs in random nurse heads and  
162 abdomens, respectively. We removed genes differentially expressed in both stage-specific and random  
163 nurses (N = 272 DEGs in heads, N = 140 DEGs in abdomens), which might differ among our colony  
164 replicates due to random colony-specific effects that were not consistently associated with social  
165 regulation of larval development. After this removal, we retained the top 1000 DEGs, sorted by P-value,  
166 for each sample type other than random nurses (larvae, stage-specific nurse heads, stage-specific nurse  
167 abdomens) for social gene regulatory network reconstruction.

168

### 169 *Reconstruction of social gene regulatory networks*

170 To infer gene-by-gene social regulatory relationships between nurses and larvae, we reconstructed gene  
171 regulatory networks acting within and between nurses and larvae (Fig S3). To identify the most highly  
172 connected (i.e. centrally located, upstream) genes of regulatory networks, we calculated within-tissue  
173 connectivity and social connectivity by averaging the strength of connections across each connection a  
174 gene made, differentiating between within-tissue (nurse-nurse or larva-larva) and social connections  
175 (nurse-larva) (Fig 1B). On average, within-tissue connectivity was higher than social connectivity  
176 (Wilcoxon rank-sum test;  $P < 0.001$  in all tissues), and within-tissue connectivity was negatively  
177 correlated with social connectivity in each tissue (Fig S4). The top enriched gene ontology terms based on  
178 social connectivity in nurses were entirely dominated by metabolism (Tables S3,S4).

179

180

181 *Secreted proteins and social gene regulation*

182 While based on our data it is not possible to distinguish between genes that code for protein products that  
183 are actually exchanged between nurses and larvae versus genes that affect behavior or physiology within  
184 organisms (Fig 1A), proteins that are known to be cellularly secreted represent promising candidates for  
185 the social regulation of larval development (40). Genes coding for proteins that are cellularly secreted in  
186 *Drosophila melanogaster* had higher social connectivity than genes coding for non-secreted orthologs in  
187 nurse heads (Fig 3A; Wilcoxon rank-sum test;  $P = 0.011$ ), though not for nurse abdomens ( $P = 0.094$ ).  
188 While many of the genes with the highest social connectivity have unknown function, one of the genes  
189 with the highest social connectivity within nurse heads was the protein *giant-lens* (Table S5). *Giant-lens*  
190 (also known as *argos*) is a secreted protein that is known to inhibit EGFR signalling in *D. melanogaster*  
191 [52]. *Giant-lens* expression in nurse heads was negatively correlated with the expression of the homolog  
192 of *eps8*, human EGFR substrate 8 (Fig 3B; note however that this pattern was not seen for all genes in the  
193 EGFR pathway). Furthermore, *giant-lens* expression in larvae steadily drops throughout development  
194 (Fig S5), suggesting that *giant-lens* expressed in nurses and passed to larvae may inhibit EGFR signaling  
195 in larvae, even as EGFR inhibition within larvae via *giant-lens* decreases over the course of development.  
196 Interestingly, *eps8* does not exhibit a similar peak and drop in expression level in reproductive-destined  
197 larvae in comparison to worker-destined larvae (Fig S6), suggesting that this pathway could be involved  
198 in the regulation of caste development.

199

200 *Molecular evolution of social gene regulatory networks*

201 To investigate the selective pressures shaping social regulatory networks, we used population genomic  
202 data from 22 resequenced *M. pharaonis* workers, using one *M. chinense* worker as an outgroup [48].  
203 Using polymorphism and divergence data, we estimated gene-specific values of selective constraint,  
204 which represents the intensity of purifying selection that genes experience [53]. To identify genes  
205 disproportionately recruited to the core of social regulatory networks, we calculated “sociality index” as  
206 the difference between social connectivity and within-tissue connectivity for each gene. Sociality index



207 was negatively correlated to selective constraint due to a positive correlation between within-tissue  
208 connectivity and constraint and a negative correlation between social connectivity and constraint (Fig 4A-  
209 C). Additionally, genes differed in sociality index according to their estimated evolutionary age, with  
210 ancient genes exhibiting lower sociality indices than genes in younger age categories (Fig 4D). Finally,  
211 while evolutionary age and evolutionary rate appear to be somewhat empirically confounded [54],  
212 selective constraint and evolutionary age were each independently associated with sociality index, based  
213 on a model including both variables as well as tissue type (GLM; LRT; evolutionary age:  $\chi^2 = 21.536$ ,  $P <$   
214  $0.001$ ; selective constraint:  $\chi^2 = 22.191$ ,  $P < 0.001$ ).

215

## 216 **Discussion**

217 In organisms with extended offspring care, developmental programs are controlled in part by socially-  
218 acting gene regulatory networks that operate between caregivers and developing offspring [14,41]. In this  
219 study, we sequenced the transcriptomes of ant nurses and larvae as they interacted across larval  
220 development to assess the effects of social interactions on gene expression dynamics. We found that large  
221 sets of genes (i.e. modules) expressed in ant larvae and their caregiving adult nurses show correlated  
222 changes in expression across development (Fig 2). The majority of nurse and larval transcriptomes was  
223 represented in these correlated modules, indicating that the tight phenotypic co-regulation characterizing  
224 nurse-larva interactions over the course of larval development is strongly reflected at the molecular level.

225 To characterize the overall network and evolutionary patterns of genes involved in nurse-larva  
226 interactions, we reverse engineered nurse-larva gene regulatory networks and calculated the “social  
227 connectivity” for each gene, defined as the sum of inferred social regulatory effects on all genes  
228 expressed in social partners. We found that genes with high social connectivity tended to have low  
229 within-individual connectivity (Fig S4; where within-individual connectivity is defined as the sum of  
230 inferred regulatory effects acting within a given tissue). Nurse-expressed genes with higher sociality  
231 indices (i.e disproportionately higher social connectivity than within-individual connectivity) tended to be

232 evolutionarily young and rapidly evolving due to relaxed selective constraint (Fig 4). Genes with high  
233 social connectivity were enriched for a number of Gene Ontology (GO) categories associated with  
234 metabolism (Tables S3,S4), consistent with the idea that molecular pathways associated with metabolism  
235 are involved in the expression of social behavior [55,56]. Finally, we found that genes encoding for  
236 orthologs of cellularly-secreted proteins important for intercellular signaling in *Drosophila melanogaster*  
237 tended to exhibit higher levels of social connectivity than their non-secreted counterparts (Fig 3A).

238         One gene that stands out in terms of being cellularly secreted and exhibiting a relatively high  
239 social connectivity is the gene *giant-lens*, which inhibits epidermal growth factor receptor (EGFR)  
240 signaling [52]. EGFR signaling affects eye and wing development [57] and body size in *D. melanogaster*  
241 [58], caste development in the honey bee *Apis mellifera* [58,59] via the transfer of royalactin from nurses  
242 to larvae [58], and worker body size variation in the ant *Camponotus floridanus* [60]. While further  
243 experimental work is necessary to ascertain whether *giant-lens* is actually orally secreted by nurses and  
244 transferred to larvae, gene expression dynamics suggest that *giant-lens* transferred from nurses to larvae  
245 may inhibit EGFR signaling at the end of larval development in worker-destined larvae (Fig 3B), but not  
246 in reproductive-destined larvae (Fig S6). While caste in *M. pharaonis* is socially regulated in the first  
247 larval stage [49], social inhibition of EGFR signaling could play a role in the regulation of worker body  
248 size [60] or secondary caste phenotypes such as wings [61,62].

249         In terms of broad evolutionary patterns, our study complements previous results suggesting genes  
250 with worker-biased expression (in comparison to genes with queen-biased expression) tend to be rapidly  
251 evolving, evolutionarily young, and loosely connected in regulatory networks [37,48,49,63–65]. Because  
252 workers are obligately sterile, their traits are shaped indirectly by kin selection, based on how they affect  
253 the reproductive success of fertile relatives (i.e. queens and males) [23,66]. As a result, all-else-equal,  
254 genes associated with worker traits are expected to evolve under relaxed selection relative to genes  
255 associated with queen traits [67,68]. In general, the suite of genic characteristics commonly associated  
256 with worker-biased genes (rapidly evolving, evolutionarily young, loosely connected) are all consistent  
257 with relaxed selection acting on genes associated with workers [49]. Here, we show that within the

258 worker caste, genes that appear to be functionally involved in the expression of social behavior (i.e.  
259 nursing) experience relaxed selective constraint relative to genes important for within-worker processes.  
260 Therefore, the combination of kin selection as well rapid evolution thought to be characteristic of social  
261 traits [25] likely act in concert to shape the labile evolutionary patterns commonly associated with  
262 worker-biased genes.

263 In this study, we reconstructed regulatory networks acting between nurses and larvae, which of  
264 course assumes that nurse gene expression changes as a function of larval stage fed. This is much more  
265 likely to be the case when nurses are specialized on feeding particular larval stages. About half of all  
266 feeding events were performed by specialist nurses in a previous study in *M. pharaonis* [40], so our  
267 pooled nurse samples likely contained a mix of generalist and specialist nurses. This would serve to  
268 effectively dilute the signal of nurse-larva interactions. Clearly, future studies would ideally focus entirely  
269 on specialists, as well as on tissues such as brains and the specific exocrine glands [69] known to be  
270 important for social behavior and communication. Despite these limitations, we were still able to observe  
271 strong transcriptomic signatures of social interactions.

272

## 273 **Conclusions**

274 In this study, we uncovered strong transcriptomic signatures of social interactions (i.e. co-regulation of  
275 nurse and larval genes and modules) and identified distinct evolutionary features of genes that were  
276 inferred to have strong social regulatory roles. Because we simultaneously collected nurses and larvae  
277 over a time series of interactions, we were able to elucidate the molecular basis of social interactions. This  
278 is a promising approach that could be readily extended to study the molecular underpinnings of all forms  
279 of social regulation in social insect colonies, including regulation of foraging, regulation of reproduction,  
280 etc.. Furthermore, by adapting the methodology presented here (i.e. simultaneous collection over the  
281 course of interactions followed by sequencing), the molecular mechanisms and evolutionary features of  
282 genes underlying a diverse array of social interactions, including courtship behavior, dominance hierarchy  
283 formation, and regulation of biofilm production could all be investigated. Overall, this study provides

284 empirical, theoretical, and methodological foundations on which future research can build upon to realize  
285 the full power of the genomics revolution for understanding the genetic underpinnings and evolution of  
286 interacting phenotypes.

287

## 288 **Methods**

289 This study builds on previous work investigating genomic signatures of kin selection in which we  
290 characterized transcriptomic profiles from adult queens and workers, as well as queen- and worker-  
291 destined larvae [48]. While stage-specific nurses were used in the previous analysis, the knowledge of the  
292 developmental stage of larvae they fed was not, as they were simply treated as adult workers. This study  
293 complements the past dataset with new data from random nurses, which were collected concurrently with  
294 previous samples.

295

### 296 *Study Design*

297 We created thirty total replicate experimental colonies of approximately equal sizes (~300-400 workers,  
298 ~300-400 larvae) from a mixture of many genetically heterogeneous colonies of the ant *Monomorium*  
299 *pharaonis*. We removed queens from ½ the study colonies to promote the production of reproductive-  
300 destined larvae. In this study, we pooled samples across colonies with and without queens, as queen  
301 presence appeared to have a negligible effect on gene expression (0 DEGs at FDR < 0.1 for each sample  
302 type). We pre-assigned colonies to one of five larval developmental stages (labeled L1-L5, where L1 and  
303 L2 refer to 1st-instar and 2nd-instar larvae and L3, L4, and L5 refer to small, medium, and large 3rd-  
304 instar larvae [50]). We sampled individuals (larvae as well as nurses) across larval development time (3-4  
305 days between each time point based on the developmental stage of the youngest larvae in colonies without  
306 queens). From each colony, we sampled stage-specific nurses and worker-destined larvae, as well as  
307 random nurses from colonies with queens and reproductive-destined larvae from colonies without queens  
308 (starting at the L2 stage, because at L1 caste cannot be distinguished [50,70]. See Table S1 for full sample  
309 list.

310 For each time point in each assigned colony, we collected stage-specific nurses, nurses feeding  
311 larvae of the specified developmental stage (L1, L2, etc). Concurrently, we haphazardly collected random  
312 nurses, nurses we observed feeding a larva of any developmental stage. After collecting nurses, we  
313 anaesthetized the colony using carbon dioxide and collected larvae of the specified developmental stage.  
314 We separated heads and abdomens of nurses to sequence separately and sequenced whole bodies of  
315 larvae. We collected ten samples of each type to pool into single samples (separated by sample type and  
316 tissue) for each colony.

317 We performed RNA-sequencing on all samples concurrently using Illumina HiSeq 2000 at  
318 Okinawa Institute of Science and Technology Sequencing Center. Reads were mapped to the NCBI  
319 version 2.0 *M. pharaonis* assembly [37], and we used RSEM [71] to estimate counts per locus and  
320 fragments per kilobase mapped (FPKM) for each locus. For further details on RNA extraction and library  
321 preparation, see [48].

322

### 323 *Transcriptome-wide signatures of nurse-larva co-expression across larval development*

324 We used an algorithm that categorizes genes based on their expression dynamics over time into a number  
325 of modules represented by pre-defined expression profiles [51]; see Fig S2 for workflow). To create  
326 modules, we started at 0 and either doubled, halved, or kept the expression level the same at each  
327 subsequent stage, resulting in 81 possible modules ( $3 \times 3 \times 3 \times 3 = 81$ ; four stages after L1). To generate  
328 gene-specific expression profiles based on real results, we calculated the average  $\log_2$  fold change in  
329 expression (FPKM) of the gene at each developmental stage compared to the initial expression level at  
330 stage L1. We then assigned each gene to the closest module by Pearson correlation between gene  
331 expression profile and module expression profile [51]. To identify significantly-enriched modules, we  
332 generated null distributions of the number of genes present in each module (based on permutation of  
333 expression over time), and retained modules with a significantly greater than expected number of genes  
334 based on these null distributions (FDR < 0.05 after Bonferroni multiple correction [51]).

335

336 *Identification of genes putatively involved in social interactions*

337 We used the package EdgeR [72] to construct models including larval developmental stage and replicate  
338 and performed differential expression analysis for each sample type separately. We retained genes  
339 differentially expressed according to a nominal P-value of less than 0.05 (i.e. no false discovery  
340 correction), as the purpose of this step was simply to identify genes that could be involved in interactions  
341 that shape larval development (rather than spurious interactions arising from replicate-specific effects).

342

343 *Social regulatory network reconstruction*

344 We normalized expression for each gene using the inverse hyperbolic sine transformation of FPKM. As  
345 input to the algorithm, we constructed “meta-samples” by combining expression data within the same  
346 replicate and time point from nurses and larvae and labeling genes according to the tissue they were  
347 expressed in, along the lines of previous host-symbiont studies [46,47]. We utilized the program GENIE3  
348 [73], the top-performing individual program in a wide survey of GRN reconstruction programs [74], to  
349 construct two types of networks: those acting between larvae and nurse heads, and those acting between  
350 larvae and nurse abdomens. We repeated the reconstruction process 1000 times and averaged pairwise  
351 connection strengths across runs. To capture the total effect of each gene on the transcriptome dynamics  
352 within tissues, we averaged the regulatory effects each gene had on all other 999 genes expressed in the  
353 same tissue (“within-individual connectivity”). Similarly, to capture the effect each gene had on the  
354 transcriptome of social partners, we averaged regulatory effects each gene had on the 1000 genes  
355 expressed in social partners (“social connectivity”).

356

357 *Estimation of selective constraint, and evolutionary rate*

358 Previously, we performed whole-genome resequencing on 22 diploid *M. pharaonis* workers as well as  
359 one diploid *M. chinense* worker to serve as an outgroup [48]. We estimated selective constraint using  
360 MKtest2.0 [75], assuming an equal value of alpha (an estimate of the proportion of nonsynonymous  
361 substitutions fixed by positive selection) across all genes. Selective constraint is the estimate of the

362 proportion of nonsynonymous mutations that are strongly deleterious and thereby do not contribute to  
363 polymorphism or divergence [75]. Selective constraint is estimated using polymorphism data, so it  
364 represents the strength of purifying selection genes experience within the study population [53].

365

#### 366 *Phylostratigraphic Analysis*

367 Phylostrata are hierarchical taxonomic categories, reflecting the most inclusive taxonomic grouping for  
368 which an ortholog of the given gene can be found [76–79]. We focused on distinguishing between genes  
369 that were evolutionarily “ancient”, present in non-insect animals, versus genes present in only insects,  
370 hymenopterans, or ants [49]. We constructed a database containing 48 hymenopteran genomes, 10 insect  
371 non-hymenopteran genomes, and 10 non-insect animal genomes, and estimated evolutionary age based on  
372 the most evolutionarily distant identified BLASTp hit (E-value  $10^{-10}$ ).

373

#### 374 *Gene Set Enrichment Analysis*

375 We performed gene set enrichment analysis based on social connectivity for each gene in each tissue  
376 separately using the R package topGO [80]. We identified enriched gene ontology terms using  
377 Kolmogorov-Smirnov tests ( $P < 0.05$ ).

378

#### 379 *General Analyses*

380 We performed all statistical analyses and generated all plots using R version in R version 3.4.0 [81], aided  
381 by the packages “reshape2” [82], “plyr” [83], and “ggplot2” [84].

382

383

#### 384 **Acknowledgments**

385 We would like to thank the following: Mandy Tin for constructing RNA-sequencing libraries and  
386 performing RNA-sequencing, Luigi Pontieri for images of pharaoh ants, Chao Tong for compiling  
387 hymenopteran genomes for use in phylostratigraphy, and Rohini Singh for comments on the manuscript.



## 388 References

- 389 1. Frank SA. All of life is social. *Curr Biol.* 2007 Aug 21;17(16):R648–50.
- 390 2. Moore AJ, Brodie ED III, Wolf JB. Interacting phenotypes and the evolutionary process: I. Direct  
391 and indirect genetic effects of social interactions. *Evolution.* 1997;51(5):1352–62.
- 392 3. Bleakley BH, Wolf JB, Moore AJ. The quantitative genetics of social behaviour. In: Székely T,  
393 Moore AJ, Komdeur J, editors. *Social behaviour: genes, ecology and evolution.* Cambridge, MA:  
394 Cambridge University Press; 2010. pp. 29–54.
- 395 4. Wolf JB, Brodie ED III, Cheverud JM, Moore AJ, Wade MJ. Evolutionary consequences of  
396 indirect genetic effects. *Trends Ecol Evol.* 1998 Feb 1;13(2):64–9.
- 397 5. Bijma P. Estimating maternal genetic effects in livestock. *J Anim Sci.* 2006 Apr;84(4):800–6.
- 398 6. Bouwman AC, Bergsma R, Duijvesteijn N, Bijma P. Maternal and social genetic effects on  
399 average daily gain of piglets from birth until weaning. *J Anim Sci.* 2010;88(9):2883–92.
- 400 7. Chen Z, Corlett RT, Jiao X, Liu S-J, Charles-Dominique T, Zhang S, et al. Prolonged milk  
401 provisioning in a jumping spider. *Science.* 2018 Nov 30;362(6418):1052–5.
- 402 8. Stay B, Coop AC. “Milk” secretion for embryogenesis in a viviparous cockroach. *Tissue and*  
403 *Cell.* 1974;6(4):669–93.
- 404 9. Moczek AP. Horn polyphenism in the beetle *Onthophagus taurus*: larval diet quality and  
405 plasticity in parental investment determine adult body size and male horn morphology. *Behav Ecol.*  
406 1998 Jan 1;9(6):636–41.
- 407 10. Lindström J. Early development and fitness in birds and mammals. *Trends Ecol Evol.* 1999  
408 Sep;14(9):343–8.
- 409 11. Wilson Edward O. *Sociobiology: the new synthesis.* Cambridge, MA: Belknap; 1975.
- 410 12. Linksvayer TA, Kaftanoglu O, Akyol E, Blatch S, Amdam GV, Page RE. Larval and nurse  
411 worker control of developmental plasticity and the evolution of honey bee queen–worker  
412 dimorphism. *J Evol Biol.* 2011 Sep 1;24(9):1939–48.
- 413 13. Wheeler DE. Developmental and physiological determinants of caste in social Hymenoptera:  
414 evolutionary implications. *Am Nat.* 1986;128(1):13–34.
- 415 14. Linksvayer TA. The molecular and evolutionary genetic implications of being truly social for the  
416 social insects. In: Zayed A, Kent CF, editors. *Advances in insect physiology.* Academic Press; 2015.  
417 pp. 271–92.
- 418 15. LeBoeuf AC, Waridel P, Brent CS, Gonçalves AN, Menin L, Ortiz D, et al. Oral transfer of  
419 chemical cues, growth proteins and hormones in social insects. *eLife Sciences.* 2016 Nov  
420 29;5:e20375.
- 421 16. LeBoeuf AC, Cohan AB, Stoffel C, Brent CS. Molecular evolution of juvenile hormone  
422 esterase-like proteins in a socially exchanged fluid. *Scientific Reports* 2018 Dec 13;17830.
- 423 17. Penick CA, Liebig J. A larval “princess pheromone” identifies future ant queens based on their



- 424 juvenile hormone content. *Anim Behav.* 2017 June;128:33-40.
- 425 18. Brian MV. Larval recognition by workers of the ant *Myrmica*. *Anim Behav.* 1975  
426 Nov;23(4):745–56.
- 427 19. Slessor KN, Winston ML, Le Conte Y. Pheromone communication in the honeybee (*Apis*  
428 *mellifera* L.). *J Chem Ecol.* 2005 Nov;31(11):2731–45.
- 429 20. Le Conte Y, Sreng L, Poitout SH. Brood pheromone can modulate the feeding behavior of *Apis*  
430 *mellifera* workers (Hymenoptera: Apidae). *J Econ Entomol.* 1995 Aug 1;88(4):798–804.
- 431 21. Kaptein N, Billen J, Gobin B. Larval begging for food enhances reproductive options in the  
432 ponerine ant *Gnamptogenys striatula*. *Anim Behav.* 2005;69(2):293–9.
- 433 22. Creemers B, Billen J, Gobin B. Larval begging behaviour in the ant *Myrmica rubra*. *Ethol Ecol*  
434 *Evol.* 2003 Jul 1;15(3):261–72.
- 435 23. Hamilton WD. The genetical evolution of social behaviour. I. *J Theor Biol.* 1964 Jul;7(1):1–16.
- 436 24. Wolf JB, Brodie ED III, Moore AJ. Interacting phenotypes and the evolutionary process. II.  
437 Selection resulting from social interactions. *Am Nat.* 1999;153(3):254–66.
- 438 25. West-Eberhard MJ. Sexual selection, social competition, and speciation. *Q Rev Biol.*  
439 1983;58(2):155–83.
- 440 26. McGlothlin JW, Moore AJ, Wolf JB, Brodie ED III. Interacting phenotypes and the evolutionary  
441 process. III. Social evolution. *Evolution.* 2010 Sep;64(9):2558–74.
- 442 27. Bailey NW, Marie-Orleach L, Moore AJ, Simmons L. Indirect genetic effects in behavioral  
443 ecology: does behavior play a special role in evolution? *Behav Ecol.* 2018 Jan 13;29(1):1–11.
- 444 28. Osborne KE, Oldroyd BP. Possible causes of reproductive dominance during emergency queen  
445 rearing by honeybees. *Anim Behav.* 1999 Aug;58(2):267–72.
- 446 29. Beekman M, Oldroyd BP. Effects of cross-feeding anarchistic and wild type honey bees:  
447 anarchistic workers are not queen-like. *Naturwissenschaften.* 2003 Apr;90(4):189–92.
- 448 30. Linksvayer TA. Direct, maternal, and subsocial genetic effects on individual and colony traits in  
449 an ant. *Evolution.* 2006 Dec;60(12):2552–61.
- 450 31. Linksvayer TA. Ant species differences determined by epistasis between brood and worker  
451 genomes. *PLoS One.* 2007 Oct 3;2(10):e994.
- 452 32. Linksvayer TA, Fondrk MK, Page RE Jr. Honeybee social regulatory networks are shaped by  
453 colony-level selection. *Am Nat.* 2009 Mar;173(3):E99–107.
- 454 33. Teseo S, Châline N, Jaisson P, Kronauer DJC. Epistasis between adults and larvae underlies  
455 caste fate and fitness in a clonal ant. *Nat Commun.* 2014;5:3363.
- 456 34. Villalta I, Blight O, Angulo E, Cerdá X, Boulay R. Early developmental processes limit socially  
457 mediated phenotypic plasticity in an ant. *Behav Ecol Sociobiol.* 2016 Feb 1;70(2):285–91.
- 458 35. Vojvodic S, Johnson BR, Harpur BA, Kent CF, Zayed A, Anderson KE, et al. The transcriptomic

- 459 and evolutionary signature of social interactions regulating honey bee caste development. *Ecol Evol.*  
460 2015;5(21):4795–807.
- 461 36. Benowitz KM, McKinney EC, Cunningham CB, Moore AJ. Predictable gene expression related  
462 to behavioral variation in parenting. *Behav Ecol;ary179*;doi:10.1093/beheco/ary179.
- 463 37. Mikheyev AS, Linksvayer TA. Genes associated with ant social behavior show distinct  
464 transcriptional and evolutionary patterns. *eLife*. 2015 Jan 26;4:e04775.
- 465 38. Kohlmeier P, Alleman AR, Libbrecht R, Foitzik S, Feldmeyer B. Gene expression is more  
466 strongly associated with behavioural specialisation than with age or fertility in ant workers. *Mol*  
467 *Ecol*; 2018 Dec 7;doi:10.1111/mec.14971.
- 468 39. Manfredini F, Lucas C, Nicolas M, Keller L, Shoemaker D, Grozinger CM. Molecular and social  
469 regulation of worker division of labour in fire ants. *Mol Ecol*. 2014 Feb;23(3):660–72.
- 470 40. Walsh JT, Warner MR, Kase A, Cushing BJ, Linksvayer TA. Ant nurse workers exhibit  
471 behavioural and transcriptomic signatures of specialization on larval stage. *Anim Behav*. 2018 Jul  
472 1;141:161–9.
- 473 41. Linksvayer TA, Fewell JH, Gadau J, Laubichler MD. Developmental evolution in social insects:  
474 regulatory networks from genes to societies. *J Exp Zool B Mol Dev Evol*. 2012 May;318(3):159–69.
- 475 42. Bloch G, Grozinger CM. Social molecular pathways and the evolution of bee societies. *Philos*  
476 *Trans R Soc Lond B Biol Sci*. 2011 Jul 27;366(1574):2155–70.
- 477 43. Burns JA, Zhang H, Hill E, Kim E, Kerney R. Transcriptome analysis illuminates the nature of  
478 the intracellular interaction in a vertebrate-algal symbiosis. *eLife* 2017;6:e22054.
- 479 44. Westermann AJ, Förstner KU, Amman F, Barquist L, Chao Y, Schulte LN, et al. Dual RNA-seq  
480 unveils noncoding RNA functions in host–pathogen interactions. *Nature*. 2016 Jan  
481 20;529(7587):496–501.
- 482 45. Westermann AJ, Gorski SA, Vogel J. Dual RNA-seq of pathogen and host. *Nat Rev Microbiol*.  
483 2012 Sep;10(9):618–30.
- 484 46. Schulze S, Henkel SG, Driesch D, Guthke R, Linde J. Computational prediction of molecular  
485 pathogen-host interactions based on dual transcriptome data. *Front Microbiol*. 2015 Feb 6;6:65.
- 486 47. Tierney L, Linde J, Müller S, Brunke S, Molina JC, Hube B, et al. An interspecies regulatory  
487 network inferred from simultaneous RNA-seq of *Candida albicans* invading innate immune cells.  
488 *Front Microbiol*. 2012 Mar 12;3:85.
- 489 48. Warner MR, Mikheyev AS, Linksvayer TA. Genomic signature of kin selection in an ant with  
490 obligately sterile workers. *Mol Biol Evol*. 2017 Jul 1;34(7):1780–7.
- 491 49. Warner MR, Qiu L, Holmes MJ, Mikheyev AS. The convergent evolution of caste in ants and  
492 honey bees is based on a shared core of ancient reproductive genes and many plastic genes. Preprint.  
493 Available from: <https://www.biorxiv.org/content/early/2018/10/26/454645.abstract>
- 494 50. Warner MR, Kovaka K, Linksvayer TA. Late-instar ant worker larvae play a prominent role in  
495 colony-level caste regulation. *Insectes Soc*. 2016 Nov 1;63(4):575–83.

- 496 51. Ernst J, Nau GJ, Bar-Joseph Z. Clustering short time series gene expression data. *Bioinformatics*.  
497 2005 Jun;21 Suppl 1:i159–68.
- 498 52. Schweitzer R, Howes R, Smith R, Shilo BZ, Freeman M. Inhibition of *Drosophila* EGF receptor  
499 activation by the secreted protein *Argos*. *Nature*. 1995 Aug 24;376(6542):699–702.
- 500 53. Kreitman M, Hudson RR. Inferring the evolutionary histories of the *Adh* and *Adh-dup* loci in  
501 *Drosophila melanogaster* from patterns of polymorphism and divergence. *Genetics*. 1991  
502 Mar;127(3):565–82.
- 503 54. Moyers BA, Zhang J. Evaluating phylostratigraphic evidence for widespread de novo gene birth  
504 in genome evolution. *Mol Biol Evol*. 2016 May;33(5):1245–56.
- 505 55. Toth AL, Robinson GE. Evo-devo and the evolution of social behavior. *Trends Genet*. 2007  
506 Jul;23(7):334–41.
- 507 56. Toth AL, Varala K, Henshaw MT, Rodriguez-Zas SL, Hudson ME, Robinson GE. Brain  
508 transcriptomic analysis in paper wasps identifies genes associated with behaviour across social insect  
509 lineages. *Proc Biol Sci*. 2010 Jul 22;277(1691):2139–48.
- 510 57. Shilo BZ. Signaling by the *Drosophila* epidermal growth factor receptor pathway during  
511 development. *Exp Cell Res*. 2003 Mar 10;284(1):140–9.
- 512 58. Kamakura M. Royalactin induces queen differentiation in honeybees. *Nature*. 2011 May  
513 26;473(7348):478–83.
- 514 59. Mutti NS, Dolezal AG, Wolschin F, Mutti JS, Gill KS, Amdam GV. IRS and TOR nutrient-  
515 signaling pathways act via juvenile hormone to influence honey bee caste fate. *J Exp Biol*. 2011 Dec  
516 1;214(23):3977–84.
- 517 60. Alvarado S, Rajakumar R, Abouheif E, Szyf M. Epigenetic variation in the *Egfr* gene generates  
518 quantitative variation in a complex trait in ants. *Nat Commun*. 2015 Mar 11;6:6513.
- 519 61. Abouheif E, Wray GA. Evolution of the gene network underlying wing polyphenism in ants.  
520 *Science*. 2002 Jul 12;297(5579):249–52.
- 521 62. Tribble W, Kronauer DJC. Caste development and evolution in ants: it's all about size. *J Exp Biol*.  
522 2017 Jan 1;220(Pt 1):53–62.
- 523 63. Morandin C, Tin MMY, Abril S, Gómez C, Pontieri L, Schiøtt M, et al. Comparative  
524 transcriptomics reveals the conserved building blocks involved in parallel evolution of diverse  
525 phenotypic traits in ants. *Genome Biol*. 2016 Mar 7;17:43.
- 526 64. Harpur BA, Kent CF, Molodtsova D, Lebon JMD, Alqarni AS, Owayss AA, et al. Population  
527 genomics of the honey bee reveals strong signatures of positive selection on worker traits. *Proc Natl  
528 Acad Sci U S A*. 2014 Feb 18;111(7):2614–9.
- 529 65. Johnson BR, Tsutsui ND. Taxonomically restricted genes are associated with the evolution of  
530 sociality in the honey bee. *BMC Genomics*. 2011 Mar 29;12:164.
- 531 66. Bourke AFG, Franks NR. *Social evolution in ants*. Princeton, NJ: Princeton University Press;  
532 1995.

- 533 67. Linksvayer TA, Wade MJ. Genes with social effects are expected to harbor more sequence  
534 variation within and between species. *Evolution*. 2009 Jul;63(7):1685–96.
- 535 68. Linksvayer TA, Wade MJ. Theoretical predictions for sociogenomic data: the effects of kin  
536 selection and sex-limited expression on the evolution of social insect genomes. *Front Ecol Evol*;  
537 2016 June;4:65.
- 538 69. Eelen D, Børgesen L, Billen J. Functional morphology of the postpharyngeal gland of queens  
539 and workers of the ant *Monomorium pharaonis* (L.). *Acta Zool*. 2006;87(2):101–11.
- 540 70. Warner MR, Lipponen J, Linksvayer TA. Pharaoh ant colonies dynamically regulate  
541 reproductive allocation based on colony demography. *Behav Ecol Sociobiol*. 2018 Mar 1;72(3):31.
- 542 71. Li B, Dewey CN. RSEM: accurate transcript quantification from RNA-Seq data with or without  
543 a reference genome. *BMC Bioinformatics*. 2011 Aug 4;12:323.
- 544 72. Robinson MD, McCarthy DJ, Smyth GK. edgeR: a Bioconductor package for differential  
545 expression analysis of digital gene expression data. *Bioinformatics*. 2010 Jan 1;26(1):139–40.
- 546 73. Huynh-Thu VA, Irrthum A, Wehenkel L, Geurts P. Inferring regulatory networks from  
547 expression data using tree-based methods. *PLoS One* 2010 Sep;doi:10.1371/journal.pone.0012776.
- 548 74. Marbach D, Costello JC, Küffner R, Vega NM, Prill RJ, Camacho DM, et al. Wisdom of crowds  
549 for robust gene network inference. *Nat Methods*. 2012 Jul 15;9(8):796–804.
- 550 75. Welch JJ. Estimating the genomewide rate of adaptive protein evolution in *Drosophila*. *Genetics*.  
551 2006 Jun;173(2):821–37.
- 552 76. Quint M, Drost H-G, Gabel A, Ullrich KK, Bönn M, Grosse I. A transcriptomic hourglass in  
553 plant embryogenesis. *Nature*. 2012 Oct 4;490(7418):98–101.
- 554 77. Drost H-G, Gabel A, Grosse I, Quint M. Evidence for active maintenance of phylotranscriptomic  
555 hourglass patterns in animal and plant embryogenesis. *Mol Biol Evol*. 2015 May;32(5):1221–31.
- 556 78. Domazet-Lošo T, Tautz D. A phylogenetically based transcriptome age index mirrors  
557 ontogenetic divergence patterns. *Nature*. 2010 Dec 9;468(7325):815–8.
- 558 79. Domazet-Lošo T, Brajković J, Tautz D. A phylostratigraphy approach to uncover the genomic  
559 history of major adaptations in metazoan lineages. *Trends Genet*. 2007;23(11):533–9.
- 560 80. Alexa A, Rahnenfuhrer J. topGO: enrichment analysis for gene ontology. R package version  
561 2.28.0.
- 562 81. R Core Team. R: A language and environment for statistical computing. Vienna, Austria: R  
563 Foundation for Statistical Computing; 2017.
- 564 82. Wickham H. Reshaping data with the reshape package. *J Stat Soft*. 2007;21(12):1-20.
- 565 83. Wickham H. The split-apply-combine strategy for data analysis. *J Stat Soft*. 2011;40(1):1-29.
- 566 84. Wickham H. 2016. ggplot2: elegant graphics for data analysis. New York: Springer-Verlag;  
567 2016.

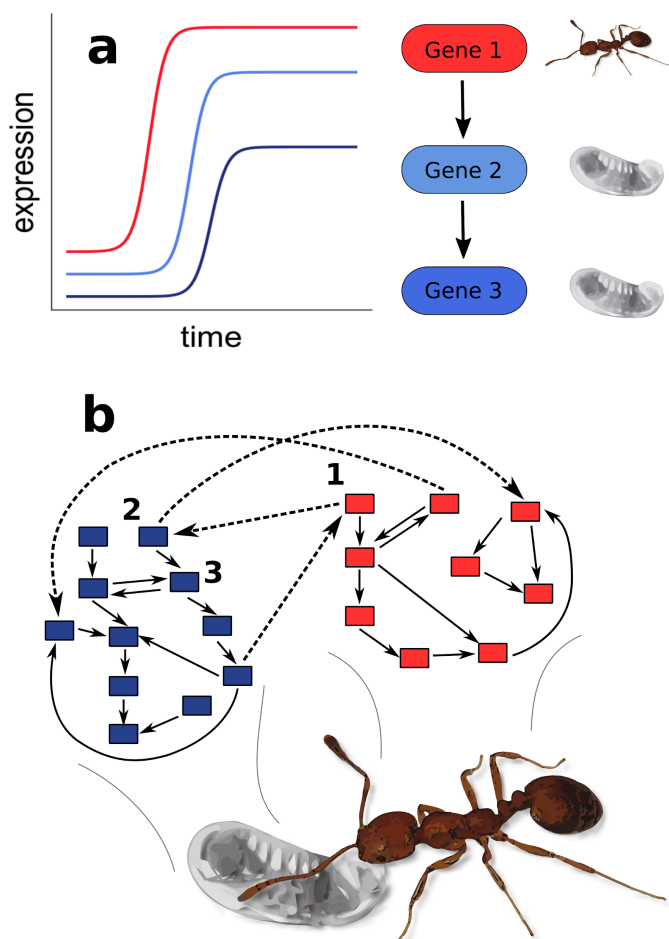

568  
569  
570  
571  
572  
573  
574

**Fig 1. Social regulation of gene expression between ant nurses and larvae.**

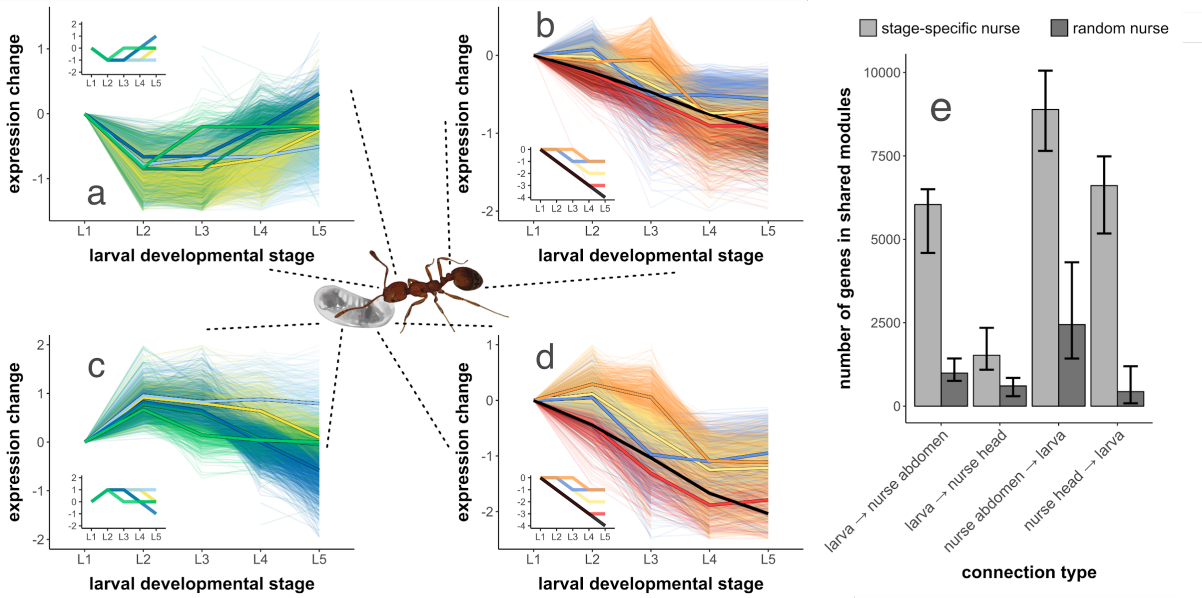

575

576

**Fig 2. Nurse and larval transcriptomes show strong signatures of gene co-expression across larval development.**

577

578

579

580

581

582

583

584

585

586

587

588

589

590

591

592

593

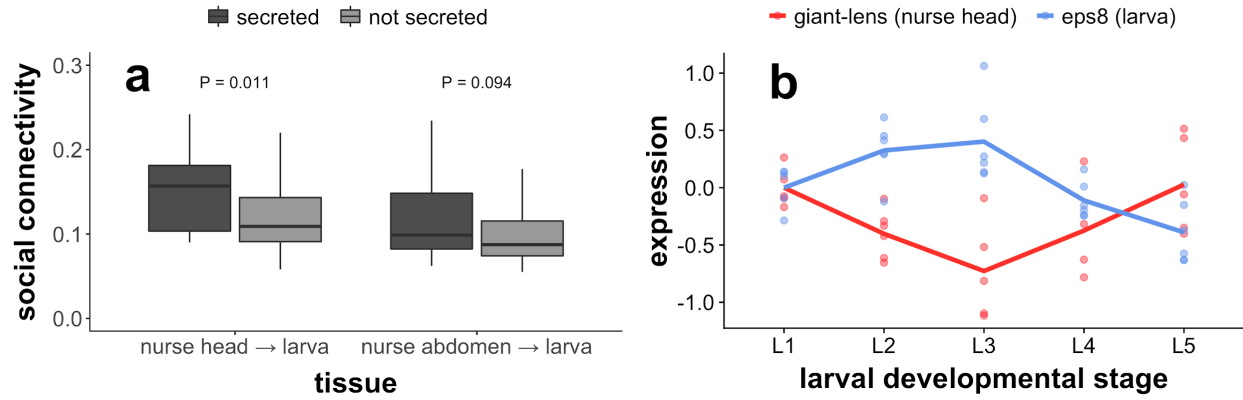

594  
595  
596  
597  
598  
599  
600  
601  
602  
603  
604  
605  
606  
607

**Fig 3. Genes encoding secreted proteins such as *giant-lens* are important for social gene regulation.**

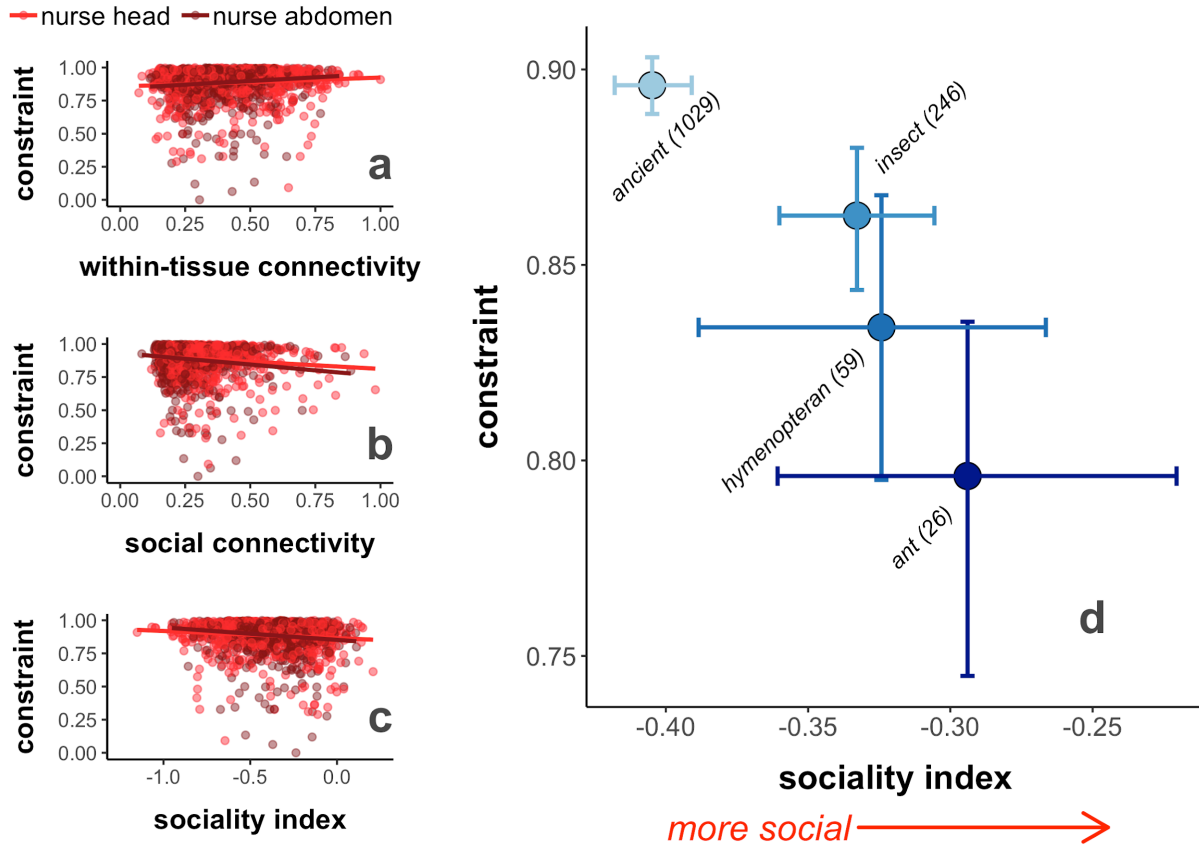

608  
609  
610  
611  
612  
613

**Fig 4. Highly social genes tend to be less evolutionarily constrained.**



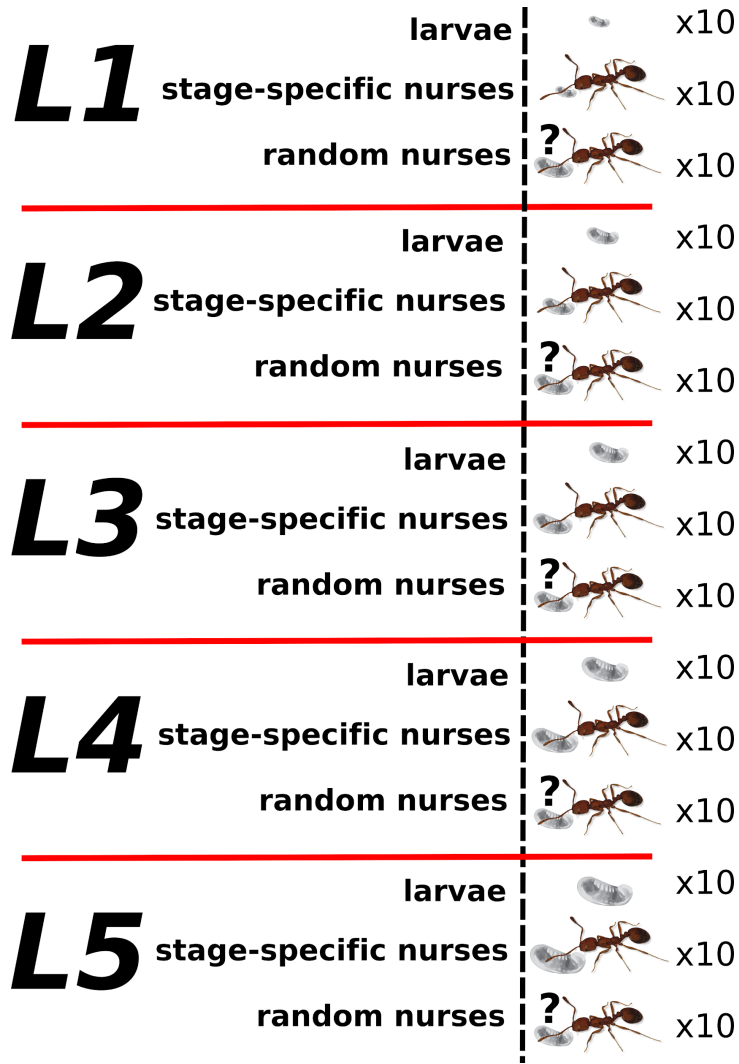

614  
615  
616  
617  
618  
619  
620

Fig S1. Diagram of sampling scheme.

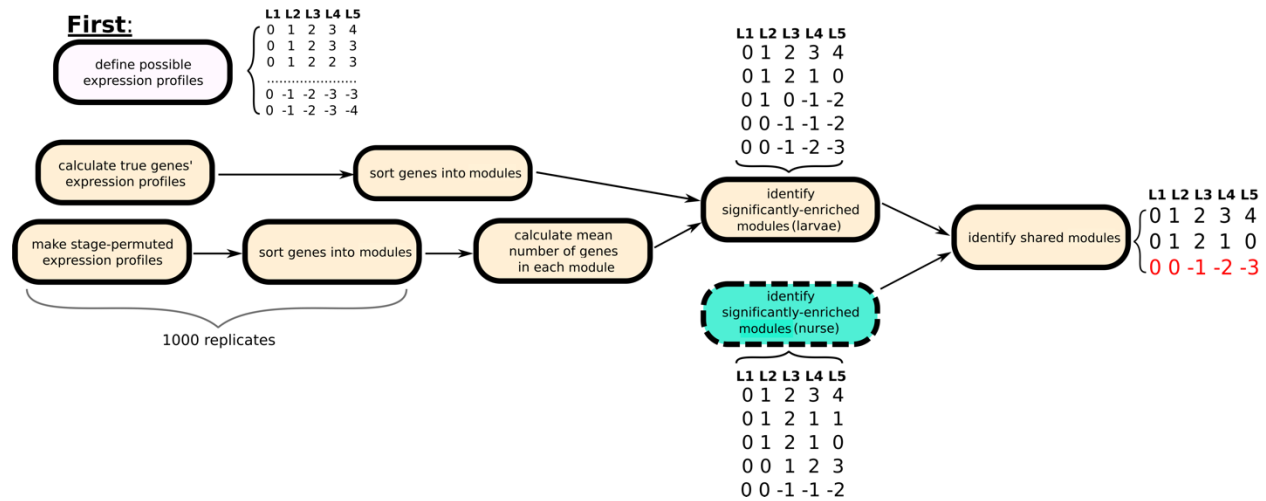

621  
622  
623  
624  
625  
626  
627  
628  
629  
630  
631  
632  
633  
634  
635  
636  
637  
638  
639

**Fig S2. Identification of significantly-enriched modules shared between larvae and nurses.**

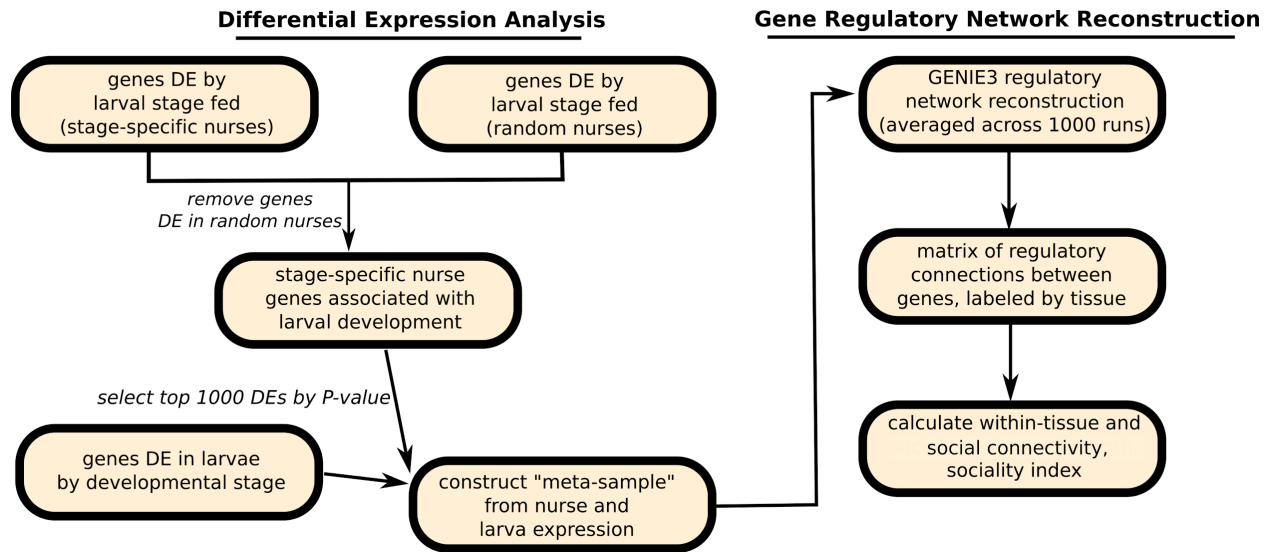

640  
641  
642  
643  
644  
645  
646

**Figure S3. Workflow of preliminary differential expression analysis and gene regulatory network reconstruction.**

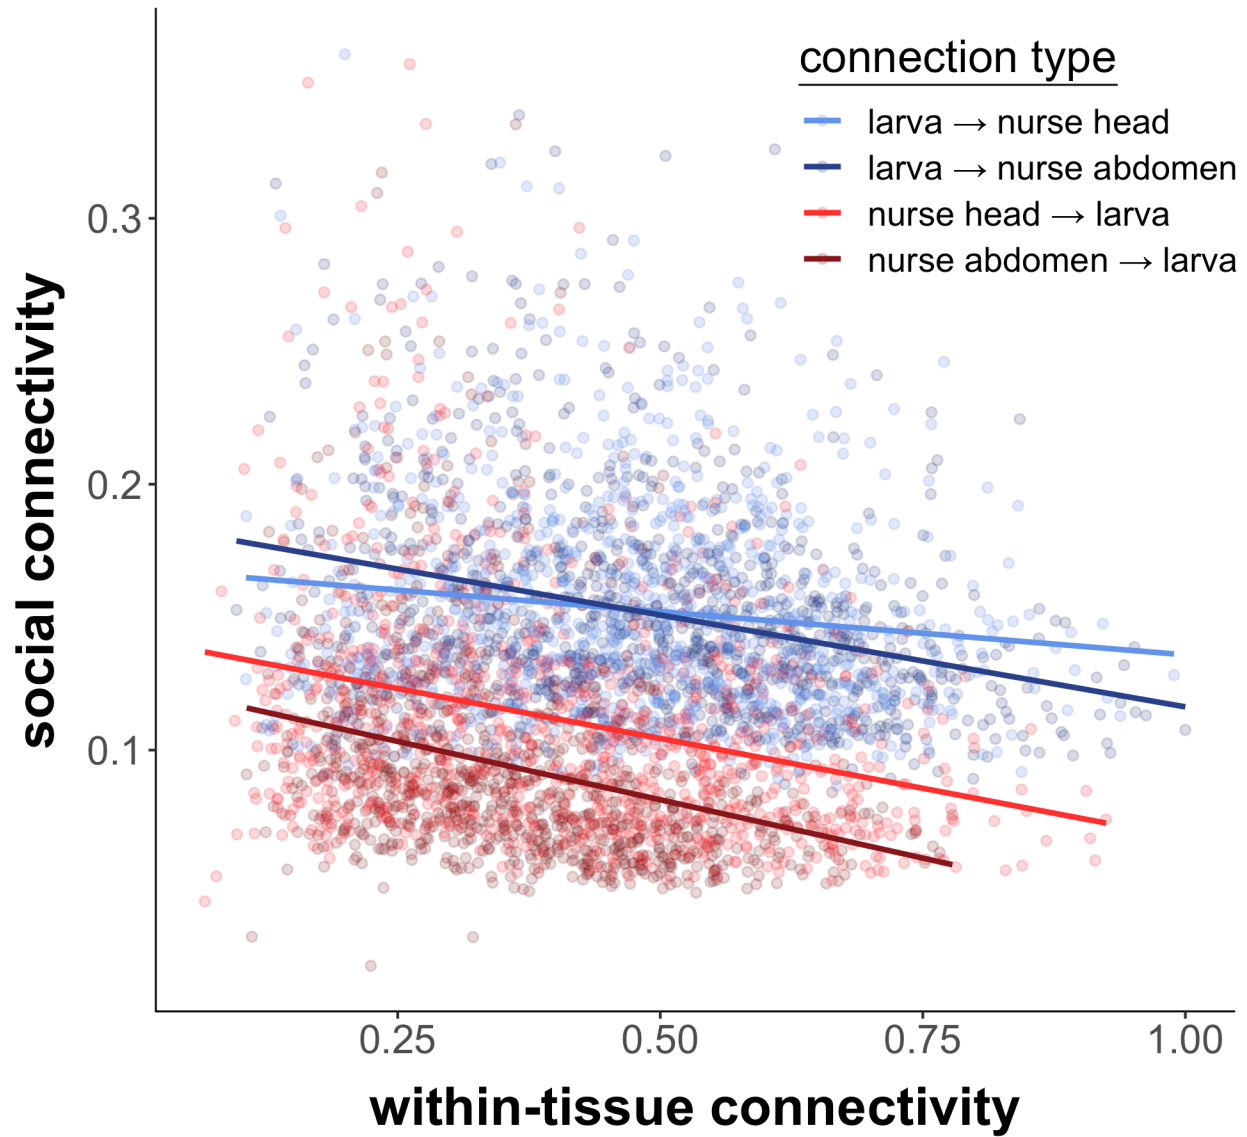

647  
648  
649  
650  
651  
652  
653  
654

**Figure S4. Genes highly connected in within-tissue networks tended to have low values of social connectivity.**

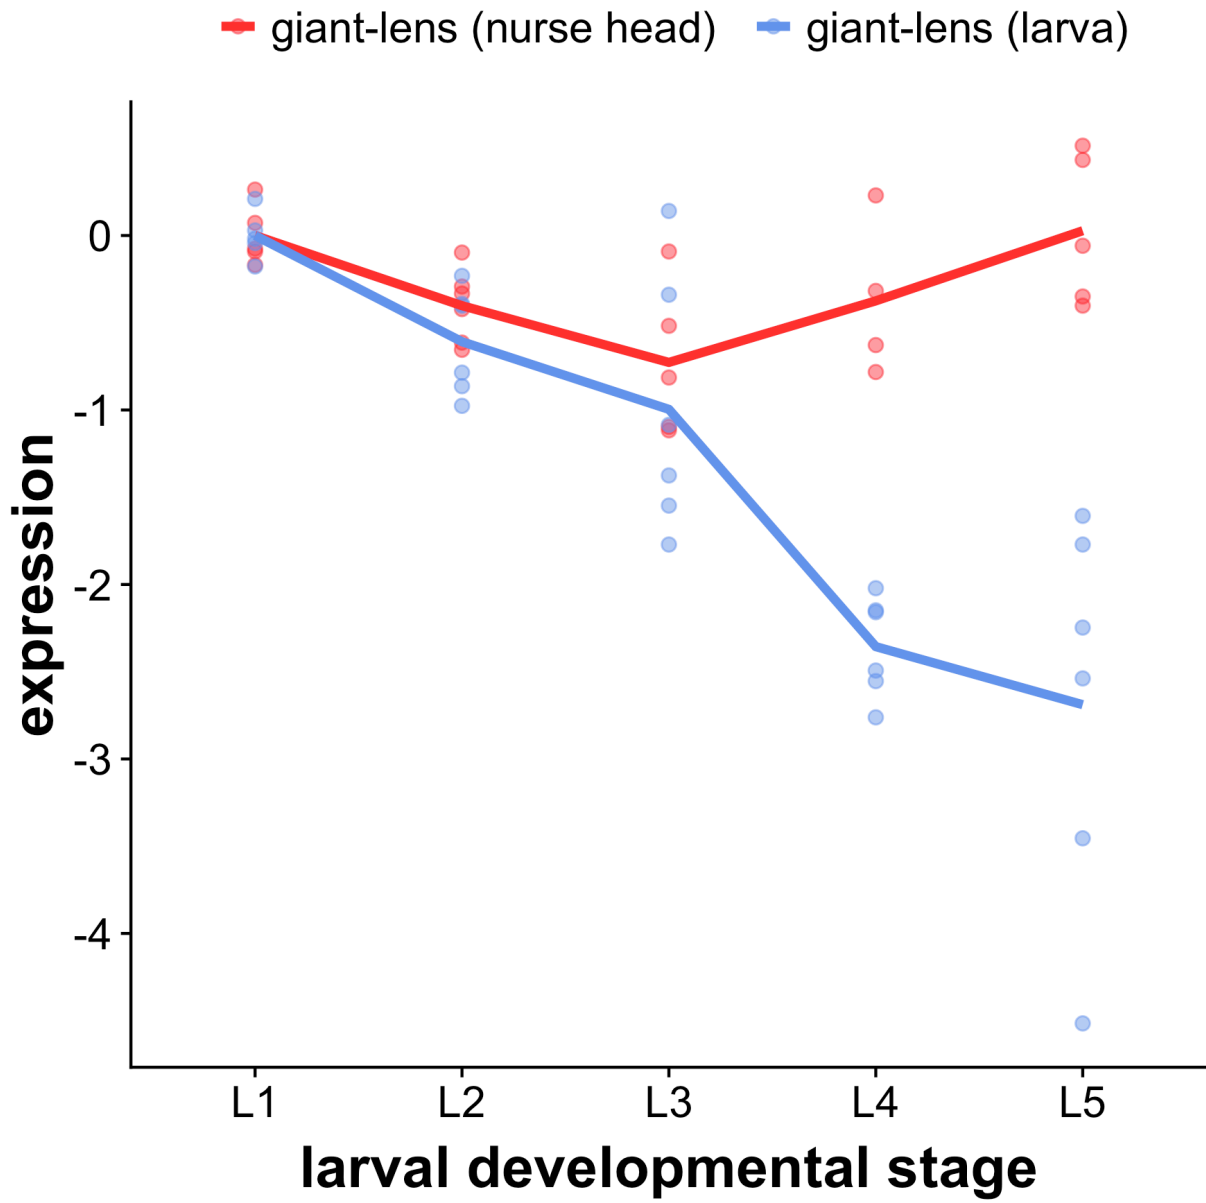

655  
656  
657  
658

Fig S5. Expression of *giant-lens* in nurse heads and worker-destined larvae.

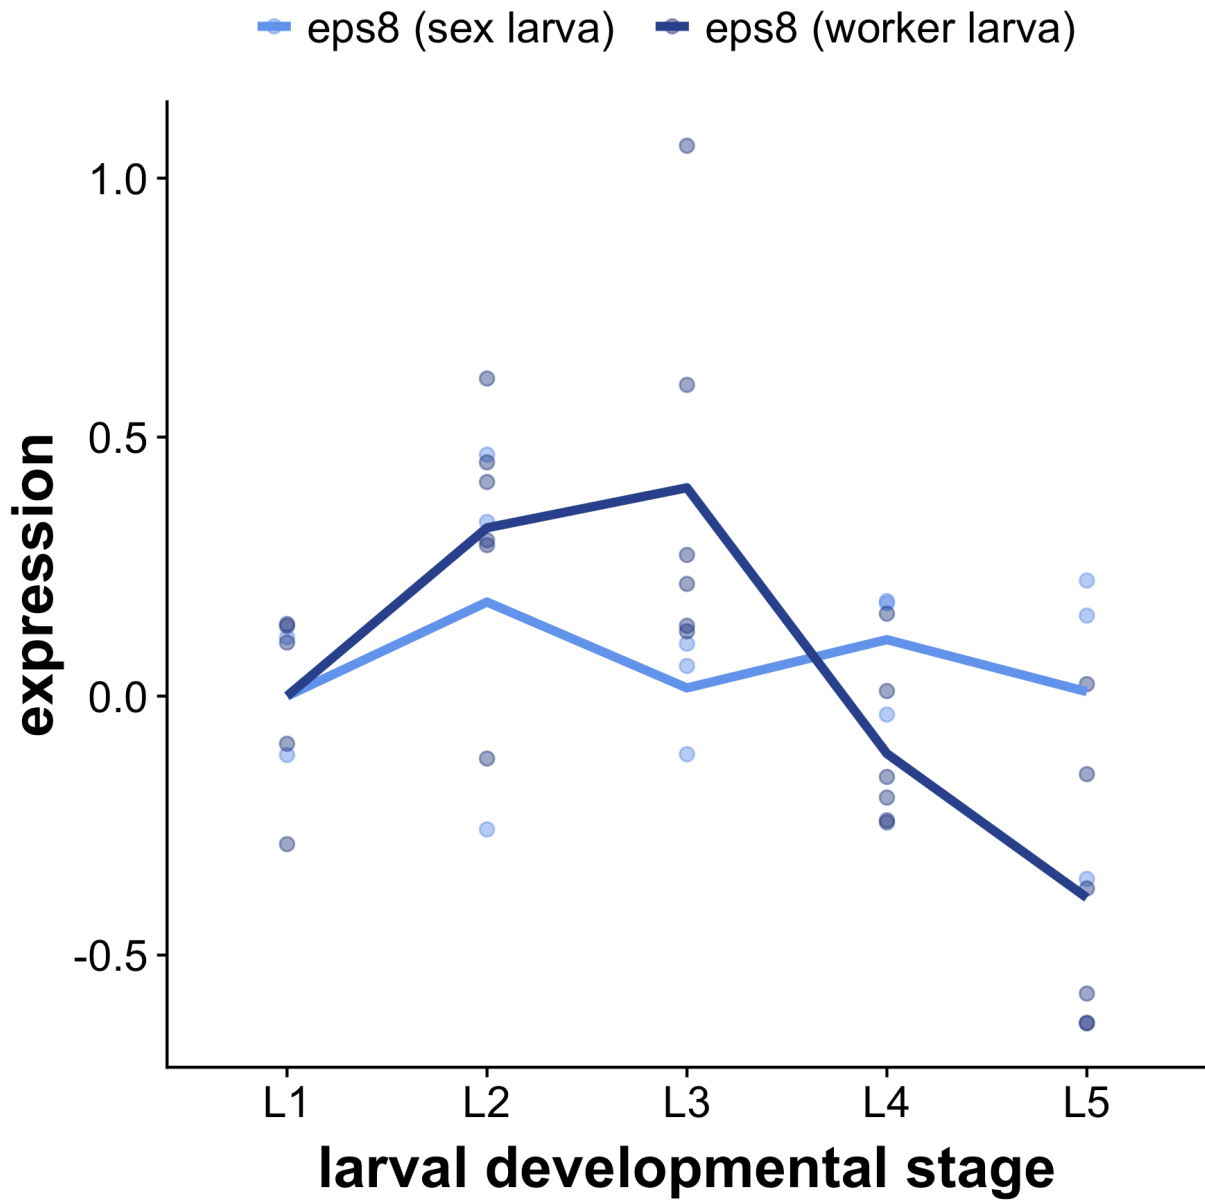

659  
660  
661  
662  
663  
664  
665  
666  
667  
668  
669  
670  
671

Fig S6. Expression of *eps8* (epidermal growth factor receptor substrate 8) in worker-destined and reproductive-destined larvae.

| <b>development stage</b> | <b>sample type</b>           | <b>number of samples</b> |
|--------------------------|------------------------------|--------------------------|
| <b>L1</b>                | larva (W/R)                  | 5                        |
|                          | stage-specific nurse head    | 5                        |
|                          | stage-specific nurse abdomen | 6                        |
|                          | random nurse head            | 3                        |
|                          | random nurse abdomen         | 2                        |
| <b>L2</b>                | larva (W)                    | 6                        |
|                          | larva (R)                    | 3                        |
|                          | stage-specific nurse head    | 6                        |
|                          | stage-specific nurse abdomen | 5                        |
|                          | random nurse head            | 3                        |
| <b>L3</b>                | larva (W)                    | 6                        |
|                          | larva (R)                    | 3                        |
|                          | stage-specific nurse head    | 5                        |
|                          | stage-specific nurse abdomen | 6                        |
|                          | random nurse head            | 3                        |
| <b>L4</b>                | larva (W)                    | 6                        |
|                          | larva (R)                    | 3                        |
|                          | stage-specific nurse head    | 4                        |
|                          | stage-specific nurse abdomen | 5                        |
|                          | random nurse head            | 2                        |
| <b>L5</b>                | larva (W)                    | 6                        |
|                          | larva (R)                    | 3                        |
|                          | stage-specific nurse head    | 5                        |
|                          | stage-specific nurse abdomen | 5                        |
|                          | random nurse head            | 3                        |
|                          | random nurse abdomen         | 3                        |

672

673 **Table S1. Description of samples included in study.**

674

675

|                                     | number of significantly-enriched modules | modules positively shared with larvae | modules negatively shared with larvae | number of genes in shared modules |
|-------------------------------------|------------------------------------------|---------------------------------------|---------------------------------------|-----------------------------------|
| <i>stage-specific nurse head</i>    | 9                                        | 0                                     | 5                                     | 6838                              |
| <i>random nurse head</i>            | 9                                        | 0                                     | 2                                     | 209                               |
| <i>stage-specific nurse abdomen</i> | 21                                       | 13                                    | 4                                     | 7943                              |
| <i>random nurse abdomen</i>         | 10                                       | 0                                     | 1                                     | 1400                              |

676  
677  
678  
679  
680  
681  
682  
683  
684  
685  
686  
687  
688  
689  
690  
691  
692  
693  
694  
695  
696  
697  
698  
699  
700  
701  
702

**Table S2. Number of nurse significantly-enriched modules shared with larvae.**



| GO.ID      | Term                                                   | Annotated | Significant | Expected | P-value |
|------------|--------------------------------------------------------|-----------|-------------|----------|---------|
| GO:0044710 | single-organism metabolic process                      | 81        | 14          | 7.82     | 0.00011 |
| GO:0055114 | oxidation-reduction process                            | 45        | 11          | 4.35     | 0.00230 |
| GO:0019637 | organophosphate metabolic process                      | 18        | 1           | 1.74     | 0.00506 |
| GO:0044711 | single-organism biosynthetic process                   | 18        | 0           | 1.74     | 0.00506 |
| GO:0006629 | lipid metabolic process                                | 12        | 2           | 1.16     | 0.00565 |
| GO:0009117 | nucleotide metabolic process                           | 14        | 0           | 1.35     | 0.00755 |
| GO:0006812 | cation transport                                       | 18        | 2           | 1.74     | 0.00781 |
| GO:0015672 | monovalent inorganic cation transport                  | 11        | 1           | 1.06     | 0.00898 |
| GO:0090407 | organophosphate biosynthetic process                   | 11        | 0           | 1.06     | 0.01033 |
| GO:0055086 | nucleobase-containing small molecule metabolic process | 16        | 0           | 1.55     | 0.01156 |

703  
704  
705  
706  
707  
708  
709  
710  
711  
712  
713  
714  
715  
716  
717  
718  
719  
720  
721  
722

**Table S3. Nurse head social connectivity GO terms based on GSEA of social connectivity.**

| GO.ID      | Term                        | Annotated | Significant | Expected | P-value |
|------------|-----------------------------|-----------|-------------|----------|---------|
| GO:0055114 | oxidation-reduction process | 52        | 7           | 4.96     | 0.022   |
| GO:0008152 | metabolic process           | 246       | 25          | 23.46    | 0.033   |

723  
724  
725  
726  
727  
728  
729  
730  
731  
732  
733  
734  
735  
736  
737  
738  
739  
740  
741  
742  
743  
744

**Table S4. Nurse abdomen GO terms based on GSEA of social connectivity.**

| nurse head                                                           | nurse abdomen                                                        |
|----------------------------------------------------------------------|----------------------------------------------------------------------|
| Basement membrane-specific heparan sulfate proteoglycan core protein | Procollagen-lysine 2-oxoglutarate 5-dioxygenase 3                    |
| Collagen alpha-1(IV) chain                                           | Collagen alpha-1(IV) chain                                           |
| Spondin-1                                                            | Tubulointerstitial nephritis antigen-like                            |
| Serine proteinase stubble                                            | Papilin                                                              |
| Angiotensin-converting enzyme (Fragment)                             | Semaphorin-2A                                                        |
| Thrombospondin-4                                                     | Transferrin                                                          |
| Protein giant-lens                                                   | Basement membrane-specific heparan sulfate proteoglycan core protein |
| Protein lev-9                                                        | Protein NPC2 homolog                                                 |
| Papilin                                                              | Testican-2                                                           |
| Glypican-6                                                           | Lysozyme                                                             |

745  
746  
747  
748  
749  
750  
751  
752  
753  
754  
755  
756  
757  
758  
759  
760  
761  
762  
763  
764  
765  
766  
767  
768  
769  
770  
771  
772  
773  
774  
775  
776

**Table S5. Swiss-Prot annotations for the top genes top genes coding for secreted proteins, sorted by social connectivity.**

777 **Figure Captions**

778

779 **Fig 1. Social regulation of gene expression between ant nurses and larvae.**

780 (A) Cartoon depicting positive gene regulation (i.e. activation) between larvae and nurses, where gene 1 is  
781 expressed in nurses and genes 2 and 3 are expressed in larvae. After the expression of gene 1 increases,  
782 the expression of gene 2 increases as a result of the social interaction of nursing (depicted in [B]). This  
783 can occur if gene 1 itself codes for a protein passed to larvae, if the mRNA transcript is passed directly, or  
784 if gene 1 activates the expression of some other gene in nurses, which in turn is passed as mRNA (or  
785 codes for a protein that is passed) to larvae. Following the increase in expression of gene 2, the expression  
786 of gene 3, which is shown to be activated by gene 2, also increases. While we have depicted a time-lag in  
787 this social regulation of gene expression, the time lags are likely too short to observe in our data, as larvae  
788 were collected every 3-4 days across development. Therefore, correlated transcriptome dynamics over  
789 development (see Fig 2) would reflect mechanisms shown here. (B) Gene regulatory networks act  
790 between and within individuals engaged in social interactions. Blue boxes are genes expressed in larvae,  
791 and red boxes are genes expressed in nurses. Solid lines depict regulatory interactions within tissues  
792 (here, within larvae or within nurses), while dashed lines represent social connections (nurse-larva or vice  
793 versa).

794

795 **Fig 2. Nurse and larval transcriptomes show strong signatures of gene co-expression across larval**  
796 **development.**

797 Plots (A-D) depict the expression profiles of individual genes (light lines) as expressed in (A) nurse head,  
798 and (B) nurse abdomens, as well as larvae (C) larvae, shared with nurse heads, and (D) larvae, shared  
799 with nurse abdomens. Dark lines indicate the median expression values of all genes sorted into modules,  
800 with pre-defined expression profiles of modules depicted in plot insets. Only the five shared modules  
801 containing the most nurse-expressed genes are shown for clarity. Larval expression profiles are divided  
802 by the nurse tissue they are shared with, such that (C) depicts larval gene expression shared with nurse

803 heads (A), while (D) depicts larval gene expression shared with nurse abdomens (B). Note that nurse  
804 heads and larvae shared inversely-related expression profiles. (E) Stage-specific nurses have more genes  
805 than random nurses in modules shared with larvae than do random nurses, reflecting more broad-scale co-  
806 expression across development. Error bars indicate 95% confidence intervals derived from systematic  
807 drop-1 jackknifing of nurse samples. N = 10944 genes total.

808

809 **Fig 3. Genes encoding secreted proteins such as *giant-lens* are important for social gene regulation.**

810 (A) Genes encoding for proteins that are secreted in *Drosophila melanogaster* exhibit higher social  
811 connectivity (i.e. more strongly socially regulate larval expression) in nurse heads than genes encoding  
812 for non-secreted proteins (Wilcoxon rank-sum test). (B) The protein *giant-lens* is one of the genes coding  
813 for secreted proteins with the highest social connectivity in nurse heads. Based on our data, *giant-lens*  
814 expressed in stage-specific nurse heads (red) appears to inhibit the expression of the homolog of human  
815 EGFR substrate 8 (*eps8*) expressed in worker-destined larvae (blue). Expression at stage  $i$  is equal to  
816  $\log_2(\text{expression}_i/\text{expression}_1)$ , i.e. the ratio of expression at the given stage to expression at the initial  
817 stage.

818

819 **Fig 4. Highly social genes tend to be less evolutionarily constrained.**

820 Selective constraint, estimated from whole-genome polymorphism data, is (A) positively correlated with  
821 within-tissue connectivity (Spearman correlation; head:  $r = 0.122$ ,  $P < 0.001$ ; abdomen:  $r = 0.217$ ,  $P <$   
822  $0.001$ ), but negatively correlated with (B) social connectivity (head:  $r = -0.090$ ,  $P = 0.009$ ; abdomen:  $r = -$   
823  $0.150$ ,  $P < 0.001$ ) and (C) sociality index (head:  $r = -0.132$ ,  $P < 0.001$ ; abdomen:  $r = -0.223$ ,  $P < 0.001$ ),  
824 where sociality index is the difference between social and within-tissue connectivity per gene. Each point  
825 in (a-c) indicates a single gene, as expressed in nurse heads or abdomens. Lines indicate trendline from  
826 linear model. (D) Highly social genes also tend to be taxonomically restricted. Individual points depict  
827 average values across nurse heads and abdomens for all genes within each estimated age class, indicated

828 by labels on points. Error bars depict 95% confidence intervals from bootstrapping. Numbers in  
829 parentheses indicate number of genes in each age class.

830

831 **Fig S1. Diagram of sampling scheme.**

832 We collected ten worker-destined larvae, ten stage-specific nurses, and ten random nurses from each  
833 colony (six colonies per time point, where time points represent larval developmental stages L1, L2, etc).  
834 We collected stage-specific nurses when we observed them feeding larvae of the given developmental  
835 stage. We collected random nurses when we observed them feeding any stage of larvae. We identified the  
836 five separate stages of larvae as in [50].

837

838 **Fig S2. Identification of significantly-enriched modules shared between larvae and nurses.**

839 Inset tables depict expression profiles of sample modules genes can be assigned to. First, we construct  
840 modules using all possible expression profiles (top left bubble). Expression profiles consist of five values,  
841 starting at zero, that indicate the  $\log_2$  fold-change in expression from the initial value (at stage L1). At  
842 each subsequent stage, we either double, halve, or keep the expression level the same. This process is  
843 repeated to produce 81 (four stages after L1;  $3 \times 3 \times 3 \times 3 = 81$ ) total modules. Next, for each tissue  
844 separately (here we depict workflow in larvae with yellow bubbles), we calculate individual gene  
845 expression profiles as the  $\log_2$  fold-change in expression from the initial value and assign genes to the  
846 closest related module by Pearson correlation. Concurrently, we permute the developmental stage labels  
847 for each gene and assign the stage-permuted genes to modules (repeated 1000 times). From these stage-  
848 permuted results, we calculate the mean number of genes assigned to each module and treat this number  
849 as a null expectation (as each expression profile is not equally likely to occur by chance). We then  
850 identify significantly-enriched modules using a one-way binomial test (with the calculated mean as the  
851 null), with a Bonferroni-corrected false discovery rate of 0.05. This entire process is repeated in a nurse  
852 tissue and significantly-enriched modules are found (blue bubble). Finally, we compare significantly-  
853 enriched modules between larvae and nurses and retain identical and inverse modules as shared profiles.

854 An example of an inversely related profile is shown in red, where larvae exhibit the enriched module [0,  
855 0, -1, -2, -3] and nurses exhibit the inverse module, [0, 0, 1, 2, 3].

856

857 **Figure S3. Workflow of preliminary differential expression analysis and gene regulatory network**  
858 **reconstruction.**

859 On the left, we identify putatively socially-acting genes through differential expression analysis. First, for  
860 nurse heads and abdomens separately, we perform differential expression analysis in stage-specific and  
861 random nurses to identify genes differentially expressed according to larval stage fed, using a nominal P-  
862 value of 0.05. We remove genes differentially expressed in random nurses, as these correspond to colony-  
863 specific environmental effects unrelated to social regulation of larval development. Next, we select the  
864 top 1000 differentially expressed genes by P-value in stage-specific nurses (after removing those DE in  
865 random nurses) as well as the top 1000 differentially expressed genes in larvae. From these genes, we  
866 create “meta-samples” by combining gene expression of larvae and stage-specific nurses collected from  
867 the same colony (separately for heads and abdomens), and labeling genes by the tissue they are expressed  
868 in. Using these meta-samples, we perform gene regulatory reconstruction (right) to identify genes  
869 expressed in nurses that regulate larval gene expression, and vice-versa. We repeat gene regulatory  
870 reconstruction 1000 times and average connection strength across runs, as the algorithm is non-  
871 deterministic. The output of gene regulatory reconstruction is a matrix of regulatory connections acting  
872 between genes. From this matrix, we calculate the average connectivity for each gene, separating within-  
873 tissue (larva-larva or nurse head-nurse head) from social (nurse-larva) connections. Genes with high  
874 connectivity are predicted to interact with many genes, i.e. are central to the network. Finally, we  
875 calculate each genes’ sociality index as the difference between social connectivity and within-tissue  
876 connectivity.

877

878 **Figure S4. Genes highly connected in within-tissue networks tended to have low values of social**  
879 **connectivity.**

880 Connectivity is representative of the number and strength of regulatory connections each gene makes.  
881 Points indicate the average connectivity for a given gene, as measured within-tissue (x-axis; i.e. larva-  
882 larva or nurse-nurse) or socially (y-axis; i.e. larva-nurse). Points are colored by tissue the connectivity is  
883 measured in (e.g., dark blue indicates genes expressed in larvae, with connectivity measured in networks  
884 constructed with nurse abdomens). Spearman  $r = -0.166, -0.374, -0.276, -0.342$  for the four tissues as  
885 ordered in legend;  $P < 0.001$  in all cases.

886 **Fig S5. Expression of *giant-lens* in nurse heads and worker-destined larvae.** Expression at stage  $i$  is  
887 equal to  $\log_2(\text{expression}_i/\text{expression}_1)$ , i.e. the ratio of expression at the given stage to expression at the  
888 initial stage.

889

890 **Fig S6. Expression of *eps8* (epidermal growth factor receptor substrate 8) in worker-destined and**  
891 **reproductive-destined larvae.** Expression at stage  $i$  is equal to  $\log_2(\text{expression}_i/\text{expression}_1)$ , i.e. the ratio  
892 of expression at the given stage to expression at the initial stage.

893

894 **Table S1. Description of samples included in study.** Worker-destined larvae are indicated by larva (W),  
895 and reproductive-destined larvae are indicated by larva (R). Larval caste cannot be distinguished at the L1  
896 stage, so L1 larvae are labeled larva (W/R). For network reconstruction, “meta” samples were used as  
897 input for network reconstruction, in which genes were labeled by sample type and grouped such that each  
898 gene contained a measurement of expression in worker-destined larvae, nurse heads, and nurse abdomens.  
899 Because sampling was uneven after removing low-quality samples, we used the minimum number of  
900 samples contained across tissues at a given stage for stage-specific nurse heads and abdomens, and  
901 randomly dropped excess samples. Overall, 24 “aggregate” samples were used as input for gene  
902 regulatory network reconstruction.

903

904 **Table S2. Number of nurse significantly-enriched modules shared with larvae.**



905 Significantly-enriched modules are defined as modules with a statistically significant number of genes  
906 assigned, as determined by a permutation test ( $FDR < 0.05$ ). Left column is the total number of  
907 significant modules for each tissue, while the second and third columns indicate number shared with  
908 larvae (out of 24 larval significantly-enriched modules). The last column indicates the total number of  
909 genes in these shared modules.
