1 **Transcriptomic basis and evolution of ant nurse-larval social regulatory interactions**

2

3 Michael R. Warner<sup>1\*</sup>, Alexander S. Mikheyev<sup>2,3</sup>, Timothy A. Linksvayer<sup>1</sup>

4

5 <sup>1</sup>Department of Biology, University of Pennsylvania, Philadelphia, Pennsylvania, USA

6 <sup>2</sup>Ecology and Evolution Unit, Okinawa Institute of Science and Technology, Onna, Okinawa, Japan

7 <sup>3</sup>Research School of Biology, Australian National University, Canberra, ACT, Australia

8

9 \* Corresponding Author

10 E-mail: michael.ryan.warner@gmail.com

11

12

13

14

15

16

17

18

19

20

21

22

23

24

25

26

## 27 **Abstract**

28 Development is often strongly regulated by interactions among close relatives, but the underlying  
29 molecular mechanisms are largely unknown. In eusocial insects, interactions between caregiving worker  
30 nurses and larvae regulate larval development and resultant adult phenotypes. Here, we begin to  
31 characterize the social interactome regulating ant larval development by collecting and sequencing the  
32 transcriptomes of interacting nurses and larvae across time. We find that the majority of nurse and larval  
33 transcriptomes exhibit parallel expression dynamics across larval development. We leverage this  
34 widespread nurse-larva gene co-expression to infer putative social gene regulatory networks acting  
35 between nurses and larvae. Genes with the strongest inferred social effects tend to be peripheral elements  
36 of within-tissue regulatory networks and are often known to encode secreted proteins. This includes  
37 interesting candidates such as the nurse-expressed *giant-lens*, which may influence larval epidermal  
38 growth factor signaling, a pathway known to influence various aspects of insect development. Finally, we  
39 find that genes with the strongest signatures of social regulation tend to experience relaxed selective  
40 constraint and are evolutionarily young. Overall, our study provides a first glimpse into the molecular and  
41 evolutionary features of the social mechanisms that regulate all aspects of social life.

42

## 43 **Author Summary**

44 Social interactions are fundamental to all forms of life, from single-celled bacteria to complex plants and  
45 animals. Despite their obvious importance, little is known about the molecular causes and consequences  
46 of social interactions. In this paper, we study the molecular basis of nurse-larva social interactions that  
47 regulate larval development in the pharaoh ant *Monomorium pharaonis*. We infer the effects of social  
48 interactions on gene expression from samples of nurses and larvae collected in the act of interaction  
49 across a developmental time series. Gene expression appears to be closely tied to these interactions, such  
50 that we can identify genes expressed in nurses with putative regulatory effects on larval gene expression.

51 Genes which we infer to have strong social regulatory effects tend to have weak regulatory effects within  
52 individuals, and highly social genes tend to experience relatively weaker natural selection in comparison  
53 to less social genes. This study represents a novel approach and foundation upon which future studies at  
54 the intersection of genetics, behavior, and evolution can build.

55

## 56 **Introduction**

57 Social interactions play a prominent role in the lives of nearly all organisms [1] and strongly affect trait  
58 expression as well as fitness [2–4]. Social interactions in the context of development (e.g. parental care)  
59 often strongly regulate developmental trajectories and resultant adult phenotypes, for example via  
60 transferred compounds such as milk in mammals [5,6], milk-like secretions in arthropods [7,8], and other  
61 forms of nutritional provisioning [9,10]. In many taxa including certain birds, mammals, and insects, care  
62 for offspring and the regulation of offspring development has shifted at least in part from parents to adult  
63 siblings, who perform alloparental care [11]. In eusocial insect societies, sterile nurse workers regulate the  
64 development of their larval siblings by modulating the quantity and quality of nourishment larvae receive  
65 [12–14], as well as through the direct transfer of growth-regulating hormones and proteins [15,16]. At the  
66 same time, larvae influence nurse provisioning behavior via pheromones [17–20] and begging behavior  
67 [21,22].

68 In general, traits such as caregiving behavior that are defined or influenced by social interactions  
69 are the property of the genomes of multiple interacting social partners [2,14]. This has implications for  
70 both the mechanistic (e.g., molecular) underpinnings of development and trait expression as well as the  
71 genetic basis of trait variation at the population level -- i.e. how allelic variation in the genomes of  
72 interacting social partners affects trait variation [2,14]. Furthermore, because social traits are expressed in  
73 one individual but impact the fitness of other individuals, social behavior and socially-influenced traits  
74 experience distinct forms of selection, including kin selection and social selection [23,24]. Altogether,  
75 these distinct genetic features and patterns of selection are often thought to lead to distinct evolutionary  
76 features, such as rapid evolutionary dynamics in comparison to other traits [25–27]. In eusocial insects,

77 previous studies show that variation in larval developmental trajectories and ultimate adult phenotypes  
78 (including reproductive caste, body size, etc.) depends on the combination of larval and nurse genotypes  
79 [28–34]. However, the identity of specific genes and molecular pathways that are functionally involved in  
80 the expression of social interactions (e.g., genes underlying nurse and larval traits affecting nurse-larva  
81 interactions) and the patterns of molecular evolution for these genes have remained less well studied  
82 [15,16,35,36].

83 Transcriptomic studies are often used to identify sets of genes underlying the expression of  
84 particular traits by performing RNA-sequencing on individuals that vary in the expression of such traits.  
85 For example, in social insects, recent studies have compared the transcriptomes of workers that perform  
86 nursing versus foraging tasks [37–39], or nurses feeding larvae of different stages or castes [35,40].  
87 However, given the phenotypic co-regulation known to occur between interacting social partners (here,  
88 nurses and larvae), it is likely that genes expressed in one social partner affect the expression of genes in  
89 the other social partner, and vice-versa, such that interacting social partners are connected by “social”  
90 gene regulatory networks [14,32,41,42]. Thus, identifying the genes important for *social interactions* such  
91 as nurse-larva interactions is only possible by studying the transcriptomic dynamics of both interacting  
92 social partners across a time series of interactions.

93 To understand the transcriptomic basis of host-symbiont interactions, recent studies have  
94 reconstructed gene regulatory networks acting between hosts and symbionts by collecting and profiling  
95 the transcriptomes of each social partner across a time series of interactions [43–47]. Here, we use  
96 analogous methodology to study transcriptomic signatures of nurse-larva interactions in the pharaoh ant,  
97 *Monomorium pharaonis*. We sample a developmental time series of larvae as well as the nurses that feed  
98 each larval stage in this series, collecting individuals at the moment of interaction in order to identify  
99 genes involved in the expression of nurse-larva interactions, as well as genes affected by these  
100 interactions (i.e. the full “social interactome” [14]). Pharaoh ant nurses tend to specialize on feeding  
101 young versus old larvae, and nurses feeding young versus old larvae show different transcriptomic  
102 profiles [40]. Larval transcriptomic profiles also change over development [48,49]. Given these results,

103 we predicted that we would observe concerted changes in broad-scale gene expression in larvae and their  
104 nurses across larval development (Fig 1), reflective of the functional importance of nurse-larva  
105 interactions. Based on our dual RNA-seq data, we infer social gene regulatory networks acting between  
106 nurses and larvae to identify candidate genes predicted to have important social regulatory effects.  
107 Finally, we combine our measures of social regulatory effects with available population genomic data  
108 [48] to characterize the patterns of molecular evolution of genes underlying nurse-larva interactions.

109

## 110 **Results**

### 111 *Transcriptome-wide signatures of nurse-larva co-expression across larval development*

112 To elucidate transcriptomic signatures of nurse-larva interactions, we performed RNA-sequencing on  
113 worker-destined larvae across five developmental stages and nurses that fed larvae of each developmental  
114 stage (termed “stage-specific” nurses; see S1 Fig for sampling scheme, S1 Table for list of samples),  
115 building upon a previously published dataset focused on caste development in *M. pharaonis* [48]. We  
116 hypothesized that if genes expressed in larvae regulate the expression of genes in nurse and vice versa, we  
117 would observe correlated expression profiles across larval development in larvae and nurses (Fig 1). As a  
118 biological control, we collected “random nurses” that we observed feeding any stage of larvae in the  
119 colony, and hence would not be expected to show correlated expression dynamics with larvae across the  
120 five larval developmental stages. We also collected reproductive-destined larvae, but unless clearly stated  
121 otherwise, all analyses were performed on only worker-destined larvae. We collected ten individuals of  
122 each sample type to pool into one sample, and we sequenced whole bodies of larvae but separated nurse  
123 heads and abdomens prior to sequencing.

124 We grouped genes into co-expression profiles or “modules” using an algorithm designed to  
125 characterize gene co-expression dynamics across a short time series [50], known as Short Time-Series  
126 Expression Mining (STEM) [51]. Each module represents a standardized pre-defined expression profile,  
127 consisting of five values that each represent the  $\log_2$  fold-change between the given developmental stage  
128 and the initial (L1) stage (see S2 Fig; this results in a total of 81 possible modules). We sorted genes into

129 the module that most closely represented their expression profile by Pearson correlation. We identified  
130 modules containing a greater than expected number of genes, where we formed null expectations using  
131 permutation tests across developmental stages [50]. We identified such significantly-enriched modules  
132 separately for larvae, stage-specific nurse heads, stage-specific nurse abdomens, random nurse heads, and  
133 random nurse abdomens. We focused on both parallel (i.e. positive regulation or activation) and anti-  
134 parallel (i.e. inhibitory) correlated expression patterns by identifying significantly-enriched modules that  
135 were shared in both larvae and nurses (parallel), as well as significantly-enriched modules for which the  
136 inverse of the module was identified as significantly-enriched in the social partner (anti-parallel).

137 Larvae and stage-specific nurses shared many significantly-enriched modules (S2 Table). These  
138 shared modules contained the majority of genes expressed in nurses (65% of genes in stage-specific nurse  
139 heads and 76% in abdomens). A substantial proportion of the larval transcriptome was also shared with  
140 stage-specific nurse heads (22% of larval genes) and abdomens (60% of larval genes). Overall there was a  
141 widespread signature of correlated transcriptional patterns between stage-specific nurses and larvae across  
142 larval development (Fig 2A-D). These coordinated dynamics were dominated by parallel associations in  
143 nurse abdomens (possibly reflecting shared metabolic pathways) but anti-parallel associations in nurse  
144 heads (possibly reflecting the social regulation of larval growth). In contrast to stage-specific nurses,  
145 random nurses (our biological control) shared few significantly-enriched modules with larvae (S2 Table),  
146 and modules shared between random nurses and larvae contained significantly fewer genes than modules  
147 shared between stage-specific nurses and larvae (Fig 2E; Wilcoxon test,  $P < 0.001$  for all comparisons).  
148 Specifically, 2% of genes expressed in random nurse heads and 13% of genes expressed in random nurse  
149 abdomens were in modules shared with larvae; 3% of genes expressed in larvae were in modules shared  
150 with random nurse heads, and 2% of genes expressed in larvae were in modules shared with random nurse  
151 abdomens.

152

153 *Identification of genes putatively involved in social interactions*

154 Given that we observed transcriptome-wide patterns consistent with nurse-larva transcriptional co-  
155 regulation across larval development, we next identified the genes that might be driving these patterns  
156 (see S3 Fig). We performed differential expression analysis to identify genes that varied in larval  
157 expression according to larval developmental stage, as well as genes that varied in nurse expression  
158 according to the developmental stage of larvae they fed. We identified 8125 differentially expressed  
159 genes (DEGs) in larvae (78% of 10446 total genes). We identified 2057 and 1408 DEGs in stage-specific  
160 nurse heads and abdomens, respectively, compared to 599 and 520 DEGs in random nurse heads and  
161 abdomens, respectively. We removed genes differentially expressed in both stage-specific and random  
162 nurses (N = 272 DEGs in heads, N = 140 DEGs in abdomens), which might differ among our colony  
163 replicates due to random colony-specific effects that were not consistently associated with social  
164 regulation of larval development. After this removal, we retained the top 1000 DEGs, sorted by P-value,  
165 for each sample type other than random nurses (larvae, stage-specific nurse heads, stage-specific nurse  
166 abdomens) for social gene regulatory network reconstruction, reasoning that these genes were the most  
167 likely to be involved in the regulation of larval development.

168

### 169 *Reconstruction of social gene regulatory networks*

170 To infer putative gene-by-gene social regulatory relationships between nurses and larvae, we  
171 reconstructed gene regulatory networks acting within and between nurses and larvae (S3 Fig). The output  
172 of regulatory network reconstruction is a matrix of connection strengths, which indicate the regulatory  
173 effect (positive or negative) one gene has on another, separated according to the tissue the gene is  
174 expressed in. To identify the most highly connected (i.e. centrally located, upstream) genes of regulatory  
175 networks, we calculated within-tissue connectivity and social connectivity by averaging the strength of  
176 connections across each connection a gene made, differentiating between within-tissue (nurse-nurse or  
177 larva-larva) and social connections (nurse-larva) (Fig 1B). On average, within-tissue connectivity was  
178 higher than social connectivity (Wilcoxon test;  $P < 0.001$  in all tissues), and within-tissue connectivity  
179 was negatively correlated with social connectivity in each tissue (S4 Fig). The top enriched gene ontology

180 terms based on social connectivity in nurses were entirely dominated by metabolism (S3,S4 Tables; see  
181 also S5 Table for the top 20 genes by nurse social connectivity).

182

### 183 *Secreted proteins and social gene regulation*

184 While based on our data it is not possible to distinguish between genes that code for protein products that  
185 are actually exchanged between nurses and larvae versus genes that affect behavior or physiology within  
186 organisms (Fig 1A), proteins that are known to be cellularly secreted represent promising candidates for  
187 the social regulation of larval development [40]. We downloaded the list of proteins that are known to be  
188 cellularly secreted from FlyBase [52] and used a previously-generated orthology map to identify ant  
189 orthologs of secreted proteins [40]. Genes coding for proteins with orthologs that are cellularly secreted in  
190 *Drosophila melanogaster* had higher social connectivity than genes coding for non-secreted orthologs in  
191 nurse heads (Fig 3A; Wilcoxon test;  $P = 0.025$ ), though not for nurse abdomens ( $P = 0.067$ ).

192 For the most part, we have focused on broad patterns of nurse-larva gene coregulation. In this  
193 paragraph, we will highlight the potential social role of one of the genes with the highest social  
194 connectivity within nurse heads, *giant-lens* (S6 Table; *giant-lens* is the 7<sup>th</sup> highest gene coding for  
195 secreted proteins by social connectivity in nurse heads). *Giant-lens* is an inhibitor of epidermal growth  
196 factor receptor (EGFR) signaling [53], and *giant-lens* expression in nurse heads was negatively associated  
197 with the expression of the homolog of *eps8*, human EGFR substrate 8 in larvae, most prominently seen in  
198 the spike in nurse *giant-lens* expression accompanied by a drop in larval *eps8* expression at the end of  
199 larval development (Fig 3B). *Giant-lens* was also used in regulatory network reconstruction in larvae (i.e.  
200 it was one of the top 1000 DEGs), and *giant-lens* expression in larvae drops steadily throughout  
201 development (S5 Fig; in contrast to the pattern of *giant-lens* expression in nurse heads). Interestingly,  
202 *eps8* does not exhibit a similar peak and drop in expression level in reproductive-destined larvae in  
203 comparison to worker-destined larvae (S6 Fig). It is important to note that these patterns were not seen for  
204 all genes in the EGFR pathway, and the results presented here cannot be taken as concrete evidence of



205 EGFR regulation via social processes. Nonetheless, the mechanism illustrated here represents a tangible  
206 example of how nurse-larva interactions could function at the molecular level.

207

### 208 *Molecular evolution of social gene regulatory networks*

209 To investigate the selective pressures shaping social regulatory networks, we used population genomic  
210 data from 22 resequenced *M. pharaonis* workers, using one sequenced *M. chinense* worker as an outgroup  
211 [48]. Using polymorphism and divergence data, we estimated gene-specific values of selective constraint,  
212 which represents the intensity of purifying selection that genes experience [54]. To identify genes  
213 disproportionately recruited to the core of social regulatory networks, we calculated “sociality index” as  
214 the difference between social connectivity and within-tissue connectivity for each gene. Sociality index  
215 was negatively correlated to selective constraint due to a positive correlation between within-tissue  
216 connectivity and constraint and a negative correlation between social connectivity and constraint (Fig 4A-  
217 C). Additionally, genes differed in sociality index according to their estimated evolutionary age, with  
218 ancient genes exhibiting lower sociality indices than genes in younger age categories (Fig 4D). Finally,  
219 while evolutionary age and evolutionary rate appear to be somewhat empirically confounded [55],  
220 selective constraint and evolutionary age were each independently associated with sociality index, based  
221 on a model including both variables as well as tissue (GLM; LRT; evolutionary age:  $\chi^2 = 21.536$ ,  $P <$   
222  $0.001$ ; selective constraint:  $\chi^2 = 22.191$ ,  $P < 0.001$ ).

223

## 224 **Discussion**

225 In organisms with extended offspring care, developmental programs are controlled in part by socially-  
226 acting gene regulatory networks that operate between caregivers and developing offspring [14,42]. In this  
227 study, we sequenced the transcriptomes of ant nurses and larvae as they interacted across larval  
228 development to assess the effects of social interactions on gene expression dynamics. We found that large  
229 sets of genes (i.e. modules) expressed in ant larvae and their caregiving adult nurses show correlated

230 changes in expression across development (Fig 2). The majority of nurse and larval transcriptomes was  
231 represented in these correlated modules, suggesting that the tight phenotypic co-regulation characterizing  
232 nurse-larva interactions over the course of larval development is also reflected at the molecular level.

233 To characterize the overall network and evolutionary patterns of genes involved in nurse-larva  
234 interactions, we reverse engineered nurse-larva gene regulatory networks and calculated the “social  
235 connectivity” for each gene, defined as the sum of inferred social regulatory effects on all genes  
236 expressed in social partners. We found that genes with high social connectivity tended to have low  
237 within-individual connectivity (S4 Fig; where within-individual connectivity is defined as the sum of  
238 inferred regulatory effects acting within a given tissue). Nurse-expressed genes with higher sociality  
239 indices (i.e disproportionately higher social connectivity than within-individual connectivity) tended to be  
240 evolutionarily young and rapidly evolving due to relaxed selective constraint (Fig 4). Genes with high  
241 social connectivity were enriched for a number of Gene Ontology (GO) categories associated with  
242 metabolism (S3,S4 Tables), consistent with the idea that molecular pathways associated with metabolism  
243 are involved in the expression of social behavior [56,57]. Previously, many of the proteins found to be  
244 widely present in social insect trophallactic fluid transferred from nurses to larvae were involved in sugar  
245 metabolism (e.g. Glucose Dehydrogenase, several types of sugar processing proteins) [15]. Along the  
246 same lines, many of the genes with with high social connectivity in our study are also annotated with  
247 terms associated with sugar metabolism (S5 Table; e.g. Glycerol-3-phosphate dehydrogenase, Glucose  
248 dehydrogenase FAD quinone, Pyruvate dehydrogenase). Finally, we found that genes encoding for  
249 orthologs of cellularly-secreted proteins in *Drosophila melanogaster* (possibly important for intercellular  
250 signaling) tended to exhibit higher levels of social connectivity than their non-secreted counterparts (Fig  
251 3A).

252 One gene that stands out in terms of being cellularly secreted and exhibiting a relatively high  
253 social connectivity is *giant-lens*, which inhibits EGFR signaling [53]. EGFR signaling affects eye and  
254 wing development [58] as well as body size in *D. melanogaster* [59], caste development in the honey bee  
255 *Apis mellifera* [59,60] via the transfer of royalactin from nurses to larvae [59], and worker body size

256 variation in the ant *Camponotus floridanus* [61]. Further experimental work is necessary to ascertain  
257 whether *giant-lens* is actually orally secreted by nurses and transferred to larvae, but gene expression  
258 dynamics are consistent with the social transfer of *giant-lens* from nurses to larvae, followed by the  
259 inhibition of EGFR signaling at the end of larval development in worker-destined larvae (Fig 3B).  
260 Importantly, this inhibition is not seen in reproductive-destined larvae (S6 Fig). While caste in *M.*  
261 *pharaonis* is socially regulated in the first larval stage [49], social inhibition of EGFR signaling could  
262 play a role in the regulation of worker body size [61] or secondary caste phenotypes such as wings  
263 [62,63].

264 In terms of broad evolutionary patterns, our study complements previous results suggesting genes  
265 with worker-biased expression tend to be rapidly evolving, evolutionarily young, and loosely connected  
266 in regulatory networks in comparison to genes with queen-biased expression [38,48,64–66]. Because  
267 pharaoh ant workers are obligately sterile, their traits are shaped indirectly by kin selection, based on how  
268 they affect the reproductive success of fertile relatives (i.e. queens and males) [23,67]. As a result, all-  
269 else-equal, genes associated with worker traits are expected to evolve under relaxed selection relative to  
270 genes associated with queen traits [68,69].

271 In general, the suite of genic characteristics commonly associated with worker-biased genes  
272 (rapidly evolving, evolutionarily young, loosely connected) are all consistent with relaxed selection acting  
273 on genes associated with workers [49]. Here, we show that within the worker caste, genes that appear to  
274 be functionally involved in the expression of social behavior (i.e. nursing) experience relaxed selective  
275 constraint relative to genes important for within-worker processes. Therefore, the combination of kin  
276 selection as well rapid evolution thought to be characteristic of social traits [25] likely act in concert to  
277 shape the labile evolutionary patterns commonly associated with worker-biased genes. Finally, it has also  
278 been suggested that plastic phenotypes such as caste recruit genes which were evolving under relaxed  
279 selection prior to the evolution of such plastic phenotypes [70–72]. Our results could also be consistent  
280 with this hypothesis, though the population genomic patterns we observe show that relaxed selective  
281 constraint is ongoing.

282 In this study, we sought to reconstruct regulatory networks acting between nurses and larvae,  
283 beginning with the assumption that nurse gene expression changes as a function of the larval stage fed.  
284 This is more likely to be the case when nurses are specialized on feeding particular larval stages.  
285 According to a previous study, about 50% of feeding events are performed by specialists (though note  
286 specialization is likely a continuous trait, and the 50% figure is the result of a binomial test) [40].  
287 Therefore, we expect our stage-specific nurse samples to comprise about 50% specialists. We also expect  
288 random nurse samples to contain 50% specialist nurses, but, crucially, the specialists should be relatively  
289 evenly divided among larval stages since random nurses were collected regardless of which larval stage  
290 they were observed feeding. Because our stage-specific nurse samples did not consist of 100% specialists,  
291 we expect that the signal of nurse-larva co-expression in our analysis is effectively diluted. In order to  
292 maximize the signal of nurse-larval co-expression dynamics, future studies would ideally focus entirely  
293 on specialists, as well as on tissues such as brains and the specific exocrine glands [73] known to be  
294 important for social behavior and communication. Despite these limitations, we were still able to observe  
295 transcriptomic signatures consistent with the social regulation of larval development.

296

## 297 **Conclusions**

298 In this study, we uncovered putative transcriptomic signatures of social regulation and identified distinct  
299 evolutionary features of genes that underlie “social physiology”, the communication between individuals  
300 that regulates division of labor within social insect colonies [74,75]. Because we simultaneously collected  
301 nurses and larvae over a time series of interactions, we were able to elucidate the putative molecular  
302 underpinnings of nurse-larval social interactions. This is a promising approach that could be readily  
303 extended to study the molecular underpinnings of all forms of social regulation in social insect colonies,  
304 including regulation of foraging, regulation of reproduction, etc.. Furthermore, by adapting the  
305 methodology presented here (i.e. simultaneous collection over the course of interactions followed by  
306 sequencing), the molecular mechanisms and evolutionary features of genes underlying a diverse array of  
307 social interactions, including courtship behavior, dominance hierarchy formation, and regulation of

308 biofilm production could all be investigated. Overall, this study provides a foundation upon which future  
309 research can build to elucidate the genetic underpinnings and evolution of interacting phenotypes.

310

## 311 **Methods**

312 This study builds on previous work investigating genomic signatures of kin selection in which we  
313 characterized transcriptomic profiles from adult queens and workers, as well as queen- and worker-  
314 destined larvae [48]. While stage-specific nurses were used in the previous analysis, the knowledge of the  
315 developmental stage of larvae they fed was not, as they were simply treated as adult workers. This study  
316 also complements the past dataset with new data from random nurses, which were collected concurrently  
317 with previous samples.

318

### 319 *Study Design*

320 To construct experimental colonies, we began by creating a homogenous mixture of approximately fifteen  
321 large source colonies of the ant *Monomorium pharaonis*. From this mixture, we created thirty total  
322 replicate experimental colonies of approximately equal sizes (~300-400 workers, ~300-400 larvae). We  
323 removed queens from ½ the study colonies to promote the production of reproductive-destined larvae.  
324 Reproductive caste is determined in *M. pharaonis* by the end of the first larval instar, likely in the egg  
325 stage [76], and queen presence promotes culling of reproductive-destined L1 larvae. Removing queens  
326 halts this culling, but it is unknown which colony members actually perform such culling [76]. While we  
327 initially expected the presence of queens to impact the gene expression profiles of nurses, we detected 0  
328 DEGs (FDR < 0.1) between queen-present and queen-absent colonies for every sample type. This could  
329 indicate that nurses don't perform culling and that worker developmental trajectories (and nutritional  
330 needs) are not appreciably different between queen-present and queen-absent colonies. Because queen  
331 presence did not substantially impact gene expression, in this study we pooled samples across queen-  
332 present and queen-absent colonies for all analyses.

333 We pre-assigned colonies to one of five larval developmental stages (labeled L1-L5, where L1  
334 and L2 refer to 1st-instar and 2nd-instar larvae and L3, L4, and L5 refer to small, medium, and large 3rd-  
335 instar larvae [77]). We identified larval stage through a combination of hair morphology and body size.  
336 L1 larvae are nearly hairless, L2 larvae have straight hairs and are twice the length of L1 larvae, and L3-  
337 L5 larvae have dense, branched hairs [78]. We separated 3rd-instar larvae into three separate stages based  
338 on body size [77] because the vast majority of larval growth occurs during these stages. We sampled  
339 individuals (larvae as well as nurses) across larval development time: beginning at the L1 stage, we  
340 sampled colonies assigned to each subsequent stage at intervals of 3-4 days, by the time the youngest  
341 larvae in colonies lacking queens were of the assigned developmental stage (note that in colonies lacking  
342 queens, no new eggs are laid so the age class of the youngest individuals progressively ages). We sampled  
343 each colony once, according to the developmental stage we had previously assigned the colony (e.g. for  
344 colonies that we labeled ‘L4’, we waited until it was time to sample L4 larvae and nurses and sampled  
345 individuals from that colony at that time). From each colony, we sampled stage-specific nurses and  
346 worker-destined larvae, as well as random nurses from colonies with queens and reproductive-destined  
347 larvae from colonies without queens (starting at the L2 stage, because at L1 caste cannot be distinguished  
348 [76,77]). Reproductive-destined larvae include both males and queens (which cannot be readily  
349 distinguished), though samples are expected to be largely made up of queen-destined individuals given  
350 the typically skewed sex ratio of *M. pharaonis* [48]. See S1 Table for full sample list.

351 For each time point in each assigned colony, we collected stage-specific nurses, nurses feeding  
352 larvae of the specified developmental stage (L1, L2, etc). Concurrently, we collected random nurses,  
353 nurses we observed feeding a larva of any developmental stage. Rather than paint-marking nurses, we  
354 collected them with forceps as soon as we saw them feeding larvae. We collected random nurses as soon  
355 as we observed them feeding a larva of any developmental stage in the course of visually scanning the  
356 colony. We did not make an attempt to systematically collect nurses from different areas of the nest but  
357 did so haphazardly, such that the distribution of larval stages fed resembled overall colony demography.  
358 Nurses feed L1 and L2 larvae exclusively via trophallaxis (i.e. liquid exchange of fluid), while nurses

359 feed L3-L5 larvae both via trophallaxis and by placing solid food in larval mouthparts [79]. To get a  
360 representative sample of all types of nurses, we did not distinguish between nurses feeding liquid and  
361 solid food, though all L3-L5 samples contained a mixture of the two. After collecting nurses, we  
362 anaesthetized the colony using carbon dioxide and collected larvae of the specified developmental stage.  
363 All samples were flash-frozen in liquid nitrogen immediately upon sample collection. Note that workers  
364 in *M. pharaonis* are monomorphic [80].

365 We performed mRNA-sequencing on all samples concurrently using Illumina HiSeq 2000 at  
366 Okinawa Institute of Science and Technology Sequencing Center. Reads were mapped to the NCBI  
367 version 2.0 *M. pharaonis* assembly [38], and we used RSEM [81] to estimate counts per locus and  
368 fragments per kilobase mapped (FPKM) for each locus. For further details on RNA extraction and library  
369 preparation, see [48].

370

### 371 *Transcriptome-wide signatures of nurse-larva co-expression across larval development*

372 We used an algorithm that categorizes genes based on their expression dynamics over time into a number  
373 of modules represented by pre-defined expression profiles [50]; see S2 Fig for workflow). To create  
374 modules, we started at 0 and either doubled, halved, or kept the expression level the same at each  
375 subsequent stage, resulting in 81 possible modules ( $3 \times 3 \times 3 \times 3 = 81$ ; four stages after L1). To generate  
376 gene-specific expression profiles based on real results, we calculated the average  $\log_2$  fold change in  
377 expression (FPKM) of the gene at each developmental stage compared to the initial expression level at  
378 stage L1. We then assigned each gene to the closest module by Pearson correlation between gene  
379 expression profile and module expression profile [50]. To identify significantly-enriched modules, we  
380 generated null distributions of the number of genes present in each module (based on permutation of  
381 expression over time), and retained modules with a significantly greater than expected number of genes  
382 based on these null distributions (FDR < 0.05 after Bonferroni multiple correction [50]).

383

### 384 *Identification of genes putatively involved in social interactions*

385 We used the package EdgeR [82] to construct models including larval developmental stage and replicate  
386 and performed differential expression analysis for each sample type separately. We retained genes  
387 differentially expressed according to a nominal P-value of less than 0.05 (i.e. no false discovery  
388 correction), as the purpose of this step was simply to identify genes that could be involved in interactions  
389 that shape larval development (rather than spurious interactions arising from replicate-specific effects).  
390 See S1 Dataset for a list of all stage-specific nurse and larval differentially expressed genes.

391

### 392 *Social regulatory network reconstruction*

393 We normalized expression for each gene using the inverse hyperbolic sine transformation of FPKM. As  
394 input to the algorithm, we constructed “meta-samples” by combining expression data within the same  
395 replicate and time point from nurses and larvae and labeling genes according to the tissue they were  
396 expressed in, along the lines of host-symbiont studies [43,45]. We utilized the program GENIE3 [83,84]  
397 to construct two types of networks: those acting between larvae and nurse heads, and those acting  
398 between larvae and nurse abdomens.

399 GENIE3 uses a random forest method to reconstruct regulatory connections between genes, in  
400 which a separate random forest model is constructed to predict the expression of each gene, with the  
401 expression of all other genes as predictor variables. The output of GENIE3 is a matrix of pairwise  
402 directional regulatory effects, where the regulatory effect of gene  $i$  on gene  $j$  is estimated as the feature  
403 importance of the expression of gene  $i$  for the random forest model predicting the expression of gene  $j$   
404 (i.e. regulatory effect is how important the expression of gene  $i$  is for determining the expression of gene  
405  $j$ ). These regulatory effects (or strengths) include both positive and negative as well as non-linear effects,  
406 though these different effect types are not distinguished.

407 As a side note, a version of GENIE3 that was developed for time series data, dynGENIE3 [85],  
408 does exist. However, we opted to utilize the original GENIE3 algorithm because we reasoned that the  
409 temporal spacing of developmental stages was likely too sparse for regulatory network reconstruction to  
410 incorporate time (note also that the co-expression algorithm we used, STEM, was explicitly designed for



411 short time series such as ours). While our method therefore does not explicitly incorporate temporal  
412 dynamics, we purposefully biased our results to emphasize larval development over differences between  
413 replicates by only utilizing genes differentially expressed across larval development (or based on larval  
414 stage fed in the case of nurses).

415 We repeated the entire regulatory reconstruction reconstruction process 1000 times and averaged  
416 pairwise connection strengths across runs, as the algorithm is non-deterministic. To capture the total  
417 effect of each gene on the transcriptome dynamics within tissues, we averaged the regulatory effects each  
418 gene had on all other 999 genes expressed in the same tissue (“within-individual connectivity”).  
419 Similarly, to capture the effect each gene had on the transcriptome of social partners, we averaged  
420 regulatory effects each gene had on the 1000 genes expressed in social partners (“social connectivity”).

421

#### 422 *Estimation of selective constraint, and evolutionary rate*

423 Previously, we performed whole-genome resequencing on 22 diploid *M. pharaonis* workers as well as  
424 one diploid *M. chinense* worker to serve as an outgroup [48]. We estimated selective constraint using  
425 MKtest2.0 [86], assuming an equal value of alpha (an estimate of the proportion of nonsynonymous  
426 substitutions fixed by positive selection) across all genes. Selective constraint is the estimate of the  
427 proportion of nonsynonymous mutations that are strongly deleterious and thereby do not contribute to  
428 polymorphism or divergence [86]. Selective constraint is estimated using polymorphism data, so it  
429 represents the strength of purifying selection genes experience within the study population [54].

430

#### 431 *Phylostratigraphic Analysis*

432 Phylostrata are hierarchical taxonomic categories, reflecting the most inclusive taxonomic grouping for  
433 which an ortholog of the given gene can be found [87–90]. We focused on distinguishing between genes  
434 that were evolutionarily “ancient”, present in non-insect animals, versus genes present in only insects,  
435 hymenopterans, or ants [49]. We constructed a database containing 48 hymenopteran available genomes,  
436 10 insect non-hymenopteran genomes, and 10 non-insect animal genomes (S2 Dataset). For outgroup

437 genomes, we focused on well-annotated genomes which spanned as many insect orders and animal phyla  
438 as possible. Using this database, we estimated evolutionary age of genes based on the most evolutionarily  
439 distant identified BLASTp hit (E-value  $10^{-10}$ ).

440

#### 441 *Gene Set Enrichment Analysis*

442 We performed gene set enrichment analysis based on social connectivity for each gene in each tissue  
443 separately using the R package topGO [91]. We identified enriched gene ontology terms using  
444 Kolmogorov-Smirnov tests ( $P < 0.05$ ).

445

#### 446 *General Analyses*

447 We performed all statistical analyses and generated all plots using R version in R version 3.4.0 [92], aided  
448 by the packages “reshape2” [93], “plyr” [94], and “ggplot2” [95].

449

#### 450 *Data Availability*

451 All raw reads are available at DDBJ bioproject PRJDB3164. All source data for generating figures is  
452 included as S3 Dataset. All scripts and processed data (e.g. expression matrices, evolutionary measures)  
453 are available at <https://github.com/warnerm/MonomoriumNurseLarva>.

454

#### 455 **Acknowledgments**

456 We would like to thank the following: Mandy Tin for constructing RNA-sequencing libraries and  
457 performing RNA-sequencing, Luigi Pontieri for images of pharaoh ants, Chao Tong for compiling  
458 hymenopteran genomes for use in phylostratigraphy, and Rohini Singh for comments on the manuscript.

459

#### 460 **References**

- 461 1. Frank SA. All of life is social. *Curr Biol*. 2007 Aug 21;17(16):R648–50.
- 462 2. Moore AJ, Brodie ED III, Wolf JB. Interacting phenotypes and the evolutionary process: I. Direct

- 463 and indirect genetic effects of social interactions. *Evolution*. 1997;51(5):1352–62.
- 464 3. Wolf JB, Brodie ED III, Cheverud JM, Moore AJ, Wade MJ. Evolutionary consequences of indirect  
465 genetic effects. *Trends Ecol Evol*. 1998 Feb 1;13(2):64–9.
- 466 4. Bleakley BH, Wolf JB, Moore AJ. The quantitative genetics of social behaviour. *Social behaviour:  
467 genes, ecology and evolution*. 2010;29–54.
- 468 5. Bijma P. Estimating maternal genetic effects in livestock. *J Anim Sci*. 2006 Apr;84(4):800–6.
- 469 6. Bouwman AC, Bergsma R, Duijvesteijn N, Bijma P. Maternal and social genetic effects on average  
470 daily gain of piglets from birth until weaning 1. *J Anim Sci*. 2010;88(9):2883–92.
- 471 7. Stay B, Coop AC. “Milk” secretion for embryogenesis in a viviparous cockroach. *Tissue and Cell*.  
472 1974;6(4):669–93.
- 473 8. Chen Z, Corlett RT, Jiao X, Liu S-J, Charles-Dominique T, Zhang S, et al. Prolonged milk  
474 provisioning in a jumping spider. *Science*. 2018 Nov 30;362(6418):1052–5.
- 475 9. Moczek AP. Horn polyphenism in the beetle *Onthophagus taurus*: larval diet quality and plasticity in  
476 parental investment determine adult body size and male horn morphology. *Behav Ecol*. 1998 Jan  
477 1;9(6):636–41.
- 478 10. Lindström J. Early development and fitness in birds and mammals. *Trends Ecol Evol*. 1999  
479 Sep;14(9):343–8.
- 480 11. Wilson Edward O. *Sociobiology: the new synthesis*. Cambridge, MA: Belknap; 1975.
- 481 12. Wheeler DE. Developmental and physiological determinants of caste in social Hymenoptera:  
482 evolutionary implications. *Am Nat*. 1986;128(1):13–34.
- 483 13. Linksvayer TA, Kaftanoglu O, Akyol E, Blatch S, Amdam GV, Page RE. Larval and nurse worker  
484 control of developmental plasticity and the evolution of honey bee queen–worker dimorphism. *J  
485 Evol Biol*. 2011 Sep 1;24(9):1939–48.
- 486 14. Linksvayer TA. The molecular and evolutionary genetic implications of being truly social for the  
487 social insects. In: Zayed A, Kent CF, editors. *Advances in Insect Physiology*. Academic Press; 2015.  
488 p. 271–92.
- 489 15. LeBoeuf AC, Waridel P, Brent CS, Gonçalves AN, Menin L, Ortiz D, et al. Oral transfer of chemical  
490 cues, growth proteins and hormones in social insects. *eLife Sciences*. 2016 Nov 29;5:e20375.
- 491 16. LeBoeuf AC, Cohan AB, Stoffel C, Brent CS. Molecular evolution of juvenile hormone esterase-  
492 like proteins in a socially exchanged fluid. *Sci Rep*. 2018 Dec 13;8:17830.
- 493 17. Brian MV. Larval recognition by workers of the ant *Myrmica*. *Anim Behav*. 1975 Nov;23(4):745–  
494 56.
- 495 18. Le Conte Y, Sreng L, Poitout SH. Brood pheromone can modulate the feeding behavior of *Apis  
496 mellifera* workers (Hymenoptera: Apidae). *J Econ Entomol*. 1995 Aug 1;88(4):798–804.
- 497 19. Slessor KN, Winston ML, Le Conte Y. Pheromone communication in the honeybee (*Apis mellifera  
498 L.*). *J Chem Ecol*. 2005 Nov;31(11):2731–45.

- 499 20. Penick CA, Liebig J. A larval “princess pheromone” identifies future ant queens based on their  
500 juvenile hormone content. *Anim Behav.* 2017 June;128:33-40.
- 501 21. Creemers B, Billen J, Gobin B. Larval begging behaviour in the ant *Myrmica rubra*. *Ethol Ecol*  
502 *Evol.* 2003 Jul 1;15(3):261–72.
- 503 22. Kaptein N, Billen J, Gobin B. Larval begging for food enhances reproductive options in the ponerine  
504 ant *Gnamptogenys striatula*. *Anim Behav.* 2005;69(2):293–9.
- 505 23. Hamilton WD. The genetical evolution of social behaviour. I. *J Theor Biol.* 1964 Jul;7(1):1–16.
- 506 24. Wolf JB, Brodie ED III, Moore AJ. Interacting phenotypes and the evolutionary process. II.  
507 Selection resulting from social interactions. *Am Nat.* 1999;153(3):254–66.
- 508 25. West-Eberhard MJ. Sexual selection, social competition, and speciation. *Q Rev Biol.*  
509 1983;58(2):155–83.
- 510 26. McGlothlin JW, Moore AJ, Wolf JB, Brodie ED III. Interacting phenotypes and the evolutionary  
511 process. III. Social evolution. *Evolution.* 2010 Sep;64(9):2558–74.
- 512 27. Bailey NW, Marie-Orleach L, Moore AJ, Simmons L. Indirect genetic effects in behavioral ecology:  
513 does behavior play a special role in evolution? *Behav Ecol.* 2018 Jan 13;29(1):1–11.
- 514 28. Osborne KE, Oldroyd BP. Possible causes of reproductive dominance during emergency queen  
515 rearing by honeybees. *Anim Behav.* 1999 Aug;58(2):267–72.
- 516 29. Beekman M, Oldroyd BP. Effects of cross-feeding anarchistic and wild type honey bees: anarchistic  
517 workers are not queen-like. *Naturwissenschaften.* 2003 Apr;90(4):189–92.
- 518 30. Linksvayer TA. Direct, maternal, and sibsocial genetic effects on individual and colony traits in an  
519 ant. *Evolution.* 2006 Dec;60(12):2552–61.
- 520 31. Linksvayer TA. Ant species differences determined by epistasis between brood and worker genomes.  
521 *PLoS One.* 2007 Oct 3;2(10):e994.
- 522 32. Linksvayer TA, Fondrk MK, Page RE Jr. Honeybee social regulatory networks are shaped by  
523 colony-level selection. *Am Nat.* 2009 Mar;173(3):E99–107.
- 524 33. Teseo S, Châline N, Jaisson P, Kronauer DJC. Epistasis between adults and larvae underlies caste  
525 fate and fitness in a clonal ant. *Nat Commun.* 2014;5:3363.
- 526 34. Villalta I, Blight O, Angulo E, Cerdá X, Boulay R. Early developmental processes limit socially  
527 mediated phenotypic plasticity in an ant. *Behav Ecol Sociobiol.* 2016 Feb 1;70(2):285–91.
- 528 35. Vojvodic S, Johnson BR, Harpur BA, Kent CF, Zayed A, Anderson KE, et al. The transcriptomic  
529 and evolutionary signature of social interactions regulating honey bee caste development. *Ecol Evol.*  
530 2015;5(21):4795–807.
- 531 36. Benowitz KM, McKinney EC, Cunningham CB, Moore AJ. Predictable gene expression related to  
532 behavioral variation in parenting. *Behav Ecol*;ary179;doi:10.1093/beheco/ary179.
- 533 37. Manfredini F, Lucas C, Nicolas M, Keller L, Shoemaker D, Grozinger CM. Molecular and social  
534 regulation of worker division of labour in fire ants. *Mol Ecol.* 2014 Feb;23(3):660–72.

- 535 38. Mikheyev AS, Linksvayer TA. Genes associated with ant social behavior show distinct  
536 transcriptional and evolutionary patterns. *Elife*. 2015 Jan 26;4:e04775.
- 537 39. Kohlmeier P, Alleman AR, Libbrecht R, Foitzik S, Feldmeyer B. Gene expression is more strongly  
538 associated with behavioural specialisation than with age or fertility in ant workers. *Mol Ecol*. 2018  
539 Dec 7;doi:10.1111/mec.14971.
- 540 40. Walsh JT, Warner MR, Kase A, Cushing BJ, Linksvayer TA. Ant nurse workers exhibit behavioural  
541 and transcriptomic signatures of specialization on larval stage. *Anim Behav*. 2018 Jul 1;141:161–9.
- 542 41. Bloch G, Grozinger CM. Social molecular pathways and the evolution of bee societies. *Philos Trans*  
543 *R Soc Lond B Biol Sci*. 2011 Jul 27;366(1574):2155–70.
- 544 42. Linksvayer TA, Fewell JH, Gadau J, Laubichler MD. Developmental evolution in social insects:  
545 regulatory networks from genes to societies. *J Exp Zool B Mol Dev Evol*. 2012 May;318(3):159–69.
- 546 43. Tierney L, Linde J, Müller S, Brunke S, Molina JC, Hube B, et al. An interspecies regulatory  
547 network inferred from simultaneous RNA-seq of *Candida albicans* invading innate immune cells.  
548 *Front Microbiol*. 2012 Mar 12;3:85.
- 549 44. Westermann AJ, Gorski SA, Vogel J. Dual RNA-seq of pathogen and host. *Nat Rev Microbiol*. 2012  
550 Sep;10(9):618–30.
- 551 45. Schulze S, Henkel SG, Driesch D, Guthke R, Linde J. Computational prediction of molecular  
552 pathogen-host interactions based on dual transcriptome data. *Front Microbiol*. 2015 Feb 6;6:65.
- 553 46. Westermann AJ, Förstner KU, Amman F, Barquist L, Chao Y, Schulte LN, et al. Dual RNA-seq  
554 unveils noncoding RNA functions in host–pathogen interactions. *Nature*. 2016 Jan  
555 20;529(7587):496–501.
- 556 47. Burns JA, Zhang H, Hill E, Kim E, Kerney R. Transcriptome analysis illuminates the nature of the  
557 intracellular interaction in a vertebrate–algal symbiosis. *ELife*. 2017;6:e22054.
- 558 48. Warner MR, Mikheyev AS, Linksvayer TA. Genomic signature of kin selection in an ant with  
559 obligately sterile workers. *Mol Biol Evol*. 2017 Jul 1;34(7):1780–7.
- 560 49. Warner MR, Qiu L, Holmes MJ, Mikheyev AS. Convergent eusocial evolution is based on a shared  
561 reproductive groundplan plus lineage-specific plastic genes. Preprint. Available from:  
562 <https://www.biorxiv.org/content/early/2018/10/26/454645.abstract>  
563
- 564 50. Ernst J, Nau GJ, Bar-Joseph Z. Clustering short time series gene expression data. *Bioinformatics*.  
565 2005 Jun;21 Suppl 1:i159–68.
- 566 51. Ernst J, Bar-Joseph Z. STEM: a tool for the analysis of short time series gene expression data. *BMC*  
567 *Bioinformatics*. 2006 Apr 5;7:191.
- 568 52. Gramates LS, Marygold SJ, Santos G dos, Urbano J-M, Antonazzo G, Matthews BB, et al. FlyBase  
569 at 25: looking to the future. *Nucleic Acids Res*. 2016;gkw1016.
- 570 53. Schweitzer R, Howes R, Smith R, Shilo BZ, Freeman M. Inhibition of *Drosophila* EGF receptor  
571 activation by the secreted protein *Argos*. *Nature*. 1995 Aug 24;376(6542):699–702.

- 572 54. Kreitman M, Hudson RR. Inferring the evolutionary histories of the *Adh* and *Adh-dup* loci in  
573 *Drosophila melanogaster* from patterns of polymorphism and divergence. *Genetics*. 1991  
574 Mar;127(3):565–82.
- 575 55. Moyers BA, Zhang J. Evaluating phylostratigraphic evidence for widespread de novo gene birth in  
576 genome evolution. *Mol Biol Evol*. 2016 May;33(5):1245–56.
- 577 56. Toth AL, Robinson GE. Evo-devo and the evolution of social behavior. *Trends Genet*. 2007  
578 Jul;23(7):334–41.
- 579 57. Toth AL, Varala K, Henshaw MT, Rodriguez-Zas SL, Hudson ME, Robinson GE. Brain  
580 transcriptomic analysis in paper wasps identifies genes associated with behaviour across social insect  
581 lineages. *Proc Biol Sci*. 2010 Jul 22;277(1691):2139–48.
- 582 58. Shilo BZ. Signaling by the *Drosophila* epidermal growth factor receptor pathway during  
583 development. *Exp Cell Res*. 2003 Mar 10;284(1):140–9.
- 584 59. Kamakura M. Royalactin induces queen differentiation in honeybees. *Nature*. 2011 May  
585 26;473(7348):478–83.
- 586 60. Mutti NS, Dolezal AG, Wolschin F, Mutti JS, Gill KS, Amdam GV. IRS and TOR nutrient-signaling  
587 pathways act via juvenile hormone to influence honey bee caste fate. *J Exp Biol*. 2011 Dec  
588 1;214(23):3977–84.
- 589 61. Alvarado S, Rajakumar R, Abouheif E, Szyf M. Epigenetic variation in the *Egfr* gene generates  
590 quantitative variation in a complex trait in ants. *Nat Commun*. 2015 Mar 11;6:6513.
- 591 62. Abouheif E, Wray GA. Evolution of the gene network underlying wing polyphenism in ants.  
592 *Science*. 2002 Jul 12;297(5579):249–52.
- 593 63. Tribble W, Kronauer DJC. Caste development and evolution in ants: it's all about size. *J Exp Biol*.  
594 2017 Jan 1;220(Pt 1):53–62.
- 595 64. Johnson BR, Tsutsui ND. Taxonomically restricted genes are associated with the evolution of  
596 sociality in the honey bee. *BMC Genomics*. 2011 Mar 29;12:164.
- 597 65. Harpur BA, Kent CF, Molodtsova D, Lebon JMD, Alqarni AS, Owayss AA, et al. Population  
598 genomics of the honey bee reveals strong signatures of positive selection on worker traits. *Proc Natl*  
599 *Acad Sci U S A*. 2014 Feb 18;111(7):2614–9.
- 600 66. Morandin C, Tin MMY, Abril S, Gómez C, Pontieri L, Schiøtt M, et al. Comparative transcriptomics  
601 reveals the conserved building blocks involved in parallel evolution of diverse phenotypic traits in  
602 ants. *Genome Biol*. 2016 Mar 7;17:43.
- 603 67. Bourke AFG, Franks NR. *Social evolution in ants*. Princeton University Press; 1995.
- 604 68. Linksvayer TA, Wade MJ. Genes with social effects are expected to harbor more sequence variation  
605 within and between species. *Evolution*. 2009 Jul;63(7):1685–96.
- 606 69. Linksvayer TA, Wade MJ. Theoretical predictions for sociogenomic data: the effects of kin selection  
607 and sex-limited expression on the evolution of social insect genomes. *Front Ecol Evol*; 2016  
608 June;4:65.



- 609 70. Hunt BG, Ometto L, Wurm Y, Shoemaker D, Yi SV, Keller L, et al. Relaxed selection is a precursor  
610 to the evolution of phenotypic plasticity. *Proc Natl Acad Sci U S A*. 2011 Sep 20;108(38):15936–41.
- 611 71. Leichty AR, Pfennig DW, Jones CD, Pfennig KS. Relaxed genetic constraint is ancestral to the  
612 evolution of phenotypic plasticity. *Integr Comp Biol*. 2012 Jul;52(1):16–30.
- 613 72. Helanterä H, Uller T. Neutral and adaptive explanations for an association between caste-biased  
614 gene expression and rate of sequence evolution. *Front Genet*. 2014 Aug 29;5:297.
- 615 73. Eelen D, Børgesen L, Billen J. Functional morphology of the postpharyngeal gland of queens and  
616 workers of the ant *Monomorium pharaonis* (L.). *Acta Zool*. 2006;87(2):101–11.
- 617 74. Seeley TD. *The Wisdom of the Hive: the social physiology of honey bee colonies*. Harvard  
618 University Press; 2009. 318 p.
- 619 75. Johnson BR, Linksvayer TA. Deconstructing the superorganism: social physiology, groundplans,  
620 and sociogenomics. *Q Rev Biol*. 2010 Mar;85(1):57–79.
- 621 76. Warner MR, Lipponen J, Linksvayer TA. Pharaoh ant colonies dynamically regulate reproductive  
622 allocation based on colony demography. *Behav Ecol Sociobiol*. 2018 Mar 1;72(3):31.
- 623 77. Warner MR, Kovaka K, Linksvayer TA. Late-instar ant worker larvae play a prominent role in  
624 colony-level caste regulation. *Insectes Soc*. 2016 Nov 1;63(4):575–83.
- 625 78. Berndt KP, Kremer G. Larvenmorphologie der Pharaoameise *Monomorium pharaonis* (L.)  
626 (Hymenoptera, Formicidae). *Zool Anz*. 1986;216.
- 627 79. Cassill DL, Butler J, Vinson SB, Wheeler DE. Cooperation during prey digestion between workers  
628 and larvae in the ant, *Pheidole spadonia*. *Insectes Soc*. 2005 Nov 1;52(4):339–43.
- 629 80. Frumhoff PC, Ward PS. Individual-level selection, colony-level selection, and the association  
630 between polygyny and worker monomorphism in ants. *Am Nat*. 1992 Mar 1;139(3):559–90.
- 631 81. Li B, Dewey CN. RSEM: accurate transcript quantification from RNA-Seq data with or without a  
632 reference genome. *BMC Bioinformatics*. 2011 Aug 4;12:323.
- 633 82. Robinson MD, McCarthy DJ, Smyth GK. edgeR: a Bioconductor package for differential expression  
634 analysis of digital gene expression data. *Bioinformatics*. 2010 Jan 1;26(1):139–40.
- 635 83. Huynh-Thu VA, Irrthum A, Wehenkel L, Geurts P. Inferring regulatory networks from expression  
636 data using tree-based methods. *PLoS One*. 2010 Sep 28;5(9).  
637 <http://dx.doi.org/10.1371/journal.pone.0012776>
- 638 84. Marbach D, Costello JC, Küffner R, Vega NM, Prill RJ, Camacho DM, et al. Wisdom of crowds for  
639 robust gene network inference. *Nat Methods*. 2012 Jul 15;9(8):796–804.
- 640 85. Huynh-Thu VA, Geurts P. dynGENIE3: dynamical GENIE3 for the inference of gene networks from  
641 time series expression data. *Sci Rep*. 2018 Feb 21;8(1):3384.
- 642 86. Welch JJ. Estimating the genomewide rate of adaptive protein evolution in *Drosophila*. *Genetics*.  
643 2006 Jun;173(2):821–37.
- 644 87. Domazet-Lošo T, Tautz D. A phylogenetically based transcriptome age index mirrors ontogenetic

- 645 divergence patterns. *Nature*. 2010 Dec 9;468(7325):815–8.
- 646 88. Quint M, Drost H-G, Gabel A, Ullrich KK, Bönn M, Grosse I. A transcriptomic hourglass in plant  
647 embryogenesis. *Nature*. 2012 Oct 4;490(7418):98–101.
- 648 89. Drost H-G, Gabel A, Grosse I, Quint M. Evidence for active maintenance of phylotranscriptomic  
649 hourglass patterns in animal and plant embryogenesis. *Mol Biol Evol*. 2015 May;32(5):1221–31.
- 650 90. Domazet-Lošo T, Brajković J, Tautz D. A phylostratigraphy approach to uncover the genomic  
651 history of major adaptations in metazoan lineages. *Trends Genet*. 2007;23(11):533–9.
- 652 91. Alexa A, Rahnenfuhrer J. topGO: enrichment analysis for gene ontology. R package version 2.28.0
- 653 92. R Core Team. R: A language and environment for statistical computing. Vienna, Austria: R  
654 Foundation for Statistical Computing; 2017.
- 655 93. Wickham H. Reshaping data with the reshape package. *J Stat Soft*. 2007;21(12):1-20.
- 656 94. Wickham H. The split-apply-combine strategy for data analysis. *J Stat Soft*. 2011;40(1):1-29.
- 657 95. Wickham H. ggplot2: elegant graphics for data analysis. New York: Springer-Verlag; 2016.

658

## 659 **Figure Captions**

### 660 **Fig 1. Social regulation of gene expression between ant nurses and larvae.**

661 (A) Cartoon depicting positive gene regulation (i.e. activation) between larvae and nurses, where gene 1 is  
662 expressed in nurses and genes 2 and 3 are expressed in larvae. After the expression of gene 1 increases,  
663 the expression of gene 2 increases as a result of the social interaction of nursing (depicted in [B]). This  
664 can occur if gene 1 itself codes for a protein passed to larvae, if the mRNA transcript is passed directly, or  
665 if gene 1 activates the expression of some other gene in nurses, which in turn is passed as mRNA (or  
666 codes for a protein that is passed) to larvae. Following the increase in expression of gene 2, the expression  
667 of gene 3, which is shown to be activated by gene 2, also increases. While we have depicted a time-lag in  
668 this social regulation of gene expression, the time lags are likely too short to observe in our data, as larvae  
669 were collected every 3-4 days across development. Therefore, correlated transcriptome dynamics over  
670 development (see Fig 2) would reflect mechanisms shown here. (B) Gene regulatory networks act  
671 between and within individuals engaged in social interactions. Blue boxes are genes expressed in larvae,  
672 and red boxes are genes expressed in nurses. Solid lines depict regulatory interactions within tissues



673 (here, within larvae or within nurses), while dashed lines represent social connections (nurse-larva or vice  
674 versa).

675

676 **Fig 2. Nurse and larval transcriptomes show strong signatures of gene co-expression across larval**  
677 **development.**

678 Plots (A-D) depict the expression profiles of individual genes (light lines) as expressed in (A) nurse head,  
679 and (B) nurse abdomens, as well as (C) larvae, shared with nurse heads, and (D) larvae, shared with nurse  
680 abdomens. Dark lines indicate the median expression values of all genes sorted into modules, with pre-  
681 defined expression profiles of modules depicted in plot insets. Colors indicate the pre-defined expression  
682 profile (i.e. module) that genes have been sorted into. Only the five shared modules containing the most  
683 nurse-expressed genes are shown for clarity. Larval expression profiles are divided by the nurse tissue  
684 they are shared with, such that (C) depicts larval gene expression shared with nurse heads (A), while (D)  
685 depicts larval gene expression shared with nurse abdomens (B). Note that nurse heads and larvae shared  
686 inversely-related expression profiles, and that this algorithm does not reveal the direction of regulation as  
687 it is simply correlation-based. (E) Stage-specific nurses have more genes than random nurses in modules  
688 shared with larvae than do random nurses, reflecting more broad-scale co-expression across development.  
689 “Connection type” refers to the tissue that the number of genes was calculated in (i.e. larva → nurse head  
690 indicates the number of genes expressed in larvae that are in modules shared with nurse heads), though  
691 directionality is not determined in this algorithm. Error bars indicate 95% confidence intervals derived  
692 from systematic drop-1 jackknifing of nurse samples. N = 10944 genes total.

693

694 **Fig 3. Genes encoding secreted proteins such as *giant-lens* are important for social gene regulation.**

695 (A) Genes encoding for proteins that are secreted in *Drosophila melanogaster* exhibit higher social  
696 connectivity (i.e. more strongly socially regulate larval expression) in nurse heads than genes encoding  
697 for non-secreted proteins (P-values from Wilcoxon test). (B) The protein *giant-lens* is one of the genes  
698 coding for secreted proteins with the highest social connectivity in nurse heads. Based on our data, *giant-*

699 *lens* expressed in stage-specific nurse heads (red) appears to inhibit the expression of the homolog of  
700 human EGFR substrate 8 (*eps8*) expressed in worker-destined larvae (blue). The expression of *giant-lens*  
701 in nurses of a given colony was negatively correlated to the expression of *eps8* in larvae of the same  
702 sampled colony ( $\rho = -0.270$ ,  $P < 0.001$ ,  $N = 25$  colony/stage pairings after removing missing samples).  
703 Expression at stage  $i$  is equal to  $\log_2(\text{expression}_i/\text{expression}_1)$ , i.e. the ratio of expression at the given  
704 stage to expression at L1.

705

706 **Fig 4. Highly social genes tend to be less evolutionarily constrained.**

707 Selective constraint, estimated from whole-genome polymorphism data, is (A) positively correlated with  
708 within-tissue connectivity (Spearman correlation; head:  $\rho = 0.122$ ,  $P < 0.001$ ; abdomen:  $\rho = 0.217$ ,  $P$   
709  $< 0.001$ ), but negatively correlated with (B) social connectivity (head:  $\rho = -0.090$ ,  $P = 0.009$ ; abdomen:  
710  $\rho = -0.150$ ,  $P < 0.001$ ) and (C) sociality index (head:  $\rho = -0.132$ ,  $P < 0.001$ ; abdomen:  $\rho = -0.223$ ,  $P$   
711  $< 0.001$ ), where sociality index is the difference between social and within-tissue connectivity per gene.  
712 Each point in (A-C) indicates a single gene, as expressed in nurse heads or abdomens. Lines are trendlines  
713 from linear model. (D) Sociality index differs according to estimated evolutionary age (GLM; LRT;  $\chi^2 =$   
714  $57.357$ ,  $P < 0.001$ ), as ancient genes tended to have lower sociality indices than all other categories  
715 (Tukey's post-hoc test; ancient - insect:  $P < 0.001$ , ancient - hymenoptera:  $P < 0.001$ , ancient - ant:  $P <$   
716  $0.001$ , all other comparisons  $P > 0.05$ ). Individual points depict average values across nurse heads and  
717 abdomens for all genes within each estimated evolutionary age class, indicated by labels on points. Error  
718 bars depict 95% confidence intervals from bootstrapping. Numbers in parentheses indicate number of  
719 genes in each age class.

720

721 **S1 Fig. Diagram of sampling scheme.**

722 We collected ten worker-destined larvae, ten stage-specific nurses, and ten random nurses from each  
723 colony (six colonies per time point, where time points represent larval developmental stages L1, L2, etc).

724 We collected stage-specific nurses when we observed them feeding larvae of the given developmental  
725 stage. We collected random nurses when we observed them feeding any stage of larvae.

726

### 727 **S2 Fig. Identification of significantly-enriched modules shared between larvae and nurses.**

728 Inset tables depict pre-defined expression profiles of modules genes can be assigned to. First, we  
729 construct modules using all possible expression profiles (top left bubble). Expression profiles consist of  
730 five values, starting at zero, that indicate the  $\log_2$  fold-change in expression from the initial value (at stage  
731 L1). At each subsequent stage, we either double, halve, or keep the expression level the same. This  
732 process is repeated to produce 81 (four stages after L1;  $3*3*3*3 = 81$ ) total modules. Next, for each tissue  
733 separately (here we depict workflow in larvae with yellow bubbles), we calculate individual gene  
734 expression profiles as the  $\log_2$  fold-change in expression from the initial value at stage L1 and assign  
735 genes to the closest related module by Pearson correlation. Concurrently, we permute the developmental  
736 stage labels for each gene and assign the stage-permuted genes to modules (repeated 1000 times). From  
737 these stage-permuted results, we calculate the mean number of genes assigned to each module and treat  
738 this number as a null expectation (as each expression profile is not equally likely to occur by chance). We  
739 then identify significantly-enriched modules using a one-way binomial test (with the calculated mean as  
740 the null), with a Bonferroni-corrected false discovery rate of 0.05. This entire process is repeated in a  
741 nurse tissue and significantly-enriched modules are found (blue bubble). Finally, we compare  
742 significantly-enriched modules between larvae and nurses and retain identical and inverse modules as  
743 shared profiles. An example of an inversely related profile is shown in red, where larvae exhibit the  
744 enriched module [0, 0, -1, -2, -3] and nurses exhibit the inverse module, [0, 0, 1, 2, 3].

745

### 746 **S3 Fig. Workflow of preliminary differential expression analysis and gene regulatory network 747 reconstruction.**

748 On the left, we identify putatively socially-acting genes through differential expression analysis. First, for  
749 nurse heads and abdomens separately, we perform differential expression analysis in stage-specific and

750 random nurses to identify genes differentially expressed according to larval stage fed, using a nominal P-  
751 value of 0.05. We remove genes differentially expressed in random nurses, as these correspond to colony-  
752 specific environmental effects unrelated to social regulation of larval development. Next, we select the  
753 top 1000 differentially expressed genes by P-value in stage-specific nurses (after removing those DE in  
754 random nurses) as well as the top 1000 differentially expressed genes in larvae. From these genes, we  
755 create “meta-samples” by combining gene expression of larvae and stage-specific nurses collected from  
756 the same colony (separately for heads and abdomens), and labeling genes by the tissue they are expressed  
757 in. Using these meta-samples, we perform gene regulatory reconstruction (right) to identify genes  
758 expressed in nurses that regulate larval gene expression, and vice-versa. We repeat gene regulatory  
759 reconstruction 1000 times and average connection strength across runs, as the algorithm is non-  
760 deterministic. The output of gene regulatory reconstruction is a matrix of regulatory connections acting  
761 between genes. From this matrix, we calculate the average connectivity for each gene, separating within-  
762 tissue (larva-larva or nurse head-nurse head) from social (nurse-larva) connections. Genes with high  
763 connectivity are predicted to interact with many genes, i.e. are central to the network. Finally, we  
764 calculate each genes’ sociality index as the difference between social connectivity and within-tissue  
765 connectivity.

766

767 **S4 Fig. Genes highly connected in social regulatory networks are loosely connected in within-tissue**  
768 **regulatory networks**

769 Connectivity is representative of the number and strength of regulatory connections each gene makes.  
770 Points indicate the average connectivity for a given gene, as measured within-tissue (x-axis; i.e. larva-  
771 larva or nurse-nurse) or socially (y-axis; i.e. larva-nurse). Points are colored by tissue the connectivity is  
772 measured in (e.g., dark blue indicates genes expressed in larvae, with connectivity measured in networks  
773 constructed with nurse abdomens). Spearman rho = -0.166, -0.374, -0.276, -0.342 for the four tissues as  
774 ordered in legend;  $P < 0.001$  in all cases.

775

776 **S5 Fig. Expression of *giant-lens* in nurse heads and worker-destined larvae.** Expression at stage  $i$  is  
777 equal to  $\log_2(\text{expression}_i/\text{expression}_1)$ , i.e. the ratio of expression at the given stage to expression at the  
778 initial (L1) stage. \*\*:  $P < 0.01$ , ns:  $P > 0.05$  (Wilcoxon test at each stage).

779

780 **S6 Fig. Expression of *eps8* (epidermal growth factor receptor substrate 8) in worker-destined and**  
781 **reproductive-destined larvae.** Expression at stage  $i$  is equal to  $\log_2(\text{expression}_i/\text{expression}_1)$ , i.e. the ratio  
782 of expression at the given stage to expression at the initial (L1) stage. Expression of *eps8* changed  
783 differently over time in worker-destined versus reproductive-destined larvae (linear model with  
784 developmental stage treated as an ordinal variable; LRT;  $\chi^2 = 12.574$ ,  $P = 0.014$  for the interaction term  
785 stage\*caste).

786

787 **S1 Table. Description of samples included in study.** Worker-destined larvae are indicated by larva (W),  
788 and reproductive-destined larvae are indicated by larva (R). Larval caste cannot be distinguished at the L1  
789 stage, so L1 larvae are labeled larva (W/R). For network reconstruction, “meta” samples were used as  
790 input for network reconstruction, in which genes were labeled by sample type and grouped such that each  
791 gene contained a measurement of expression in worker-destined larvae, nurse heads, and nurse abdomens.  
792 After sample collection and RNA extraction, some samples exhibited clearly degraded RNA according to  
793 an Agilent Bioanalyzer assay. Removing these samples caused sampling to be uneven, so we used the  
794 minimum number of samples contained across tissues at a given stage for stage-specific nurse heads and  
795 abdomens, and randomly dropped excess samples. Overall, 25 “aggregate” samples were used as input for  
796 gene regulatory network reconstruction.

797

798 **S2 Table. Number of nurse significantly-enriched modules shared with larvae.**

799 Significantly-enriched modules are defined as modules with a statistically significant number of genes  
800 assigned, as determined by a permutation test ( $FDR < 0.05$ ). Left column is the total number of  
801 significant modules for each tissue, while the second and third columns indicate number shared with

802 larvae (out of 24 larval significantly-enriched modules). The last column indicates the total number of  
803 genes in these shared modules.

804

805 **S3 Table. Nurse head social connectivity GO terms based on GSEA of social connectivity.**

806 P-value (unadjusted) is from Kolmogorov Smirnov (K-S) test. Enriched terms have higher than expected  
807 social connectivity in nurse heads.

808

809 **S4 Table. Nurse abdomen GO terms based on GSEA of social connectivity.**

810 P-value (unadjusted) is from Kolmogorov Smirnov (K-S) test. Enriched terms have higher than expected  
811 social connectivity in nurse abdomens.

812

813 **S5 Table. Top 20 genes by social connectivity in nurses.**

814 SwissProt ID is listed from automated annotation where a term was found.

815

816 **S6 Table. SwissProt annotations for the top genes coding for secreted proteins, sorted by social  
817 connectivity.**

818 Only genes with SwissProt annotations are included. All genes listed encode for secreted proteins in *D.*  
819 *melanogaster*.

820

821 **S1 Dataset. Complete list of all differentially expressed genes.**

822 Each gene can be differentially expressed in three tissues: worker larva, nurse head, or nurse abdomen. P-  
823 values are listed for each tissue. The top 1000 differentially expressed genes (by P-value) were used for  
824 regulatory network reconstruction. Social connectivity is the sum of all regulatory interactions in the  
825 direction specified by “estimated regulatory direction”.

826

827 **S2 Dataset. List of species used for phylostratigraphy.**

828 Each species listed, with their NCBI taxonomic ID, was used in the construction of the phylostratigraphic  
829 database to estimate evolutionary ages of genes.

830

831 **S3 Dataset. Data files used to construct all figures.**

832 All data are organized in text files, with the relevant figure listed in the title.

**expressing individual**

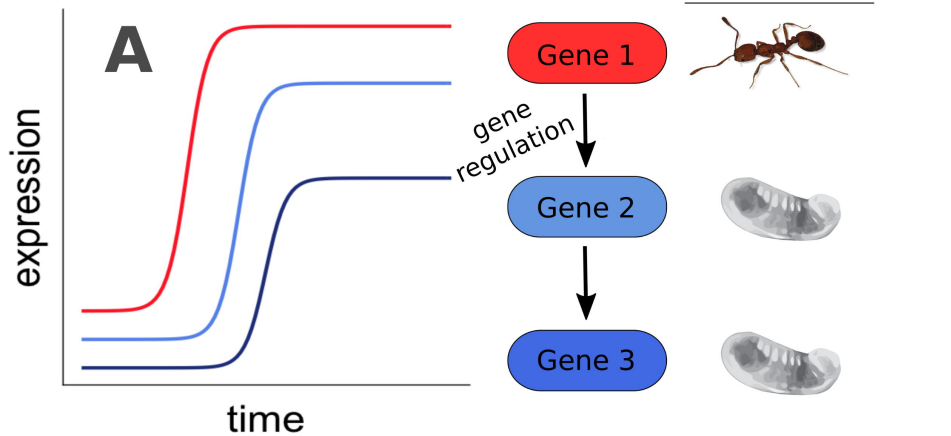

**connection type**

----- social  
———— within-tissue

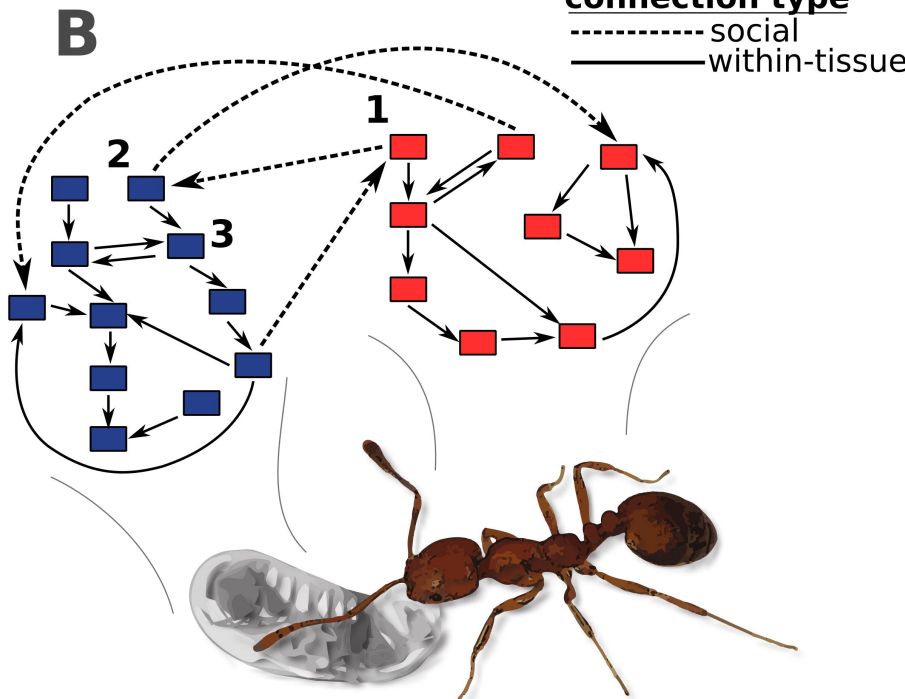



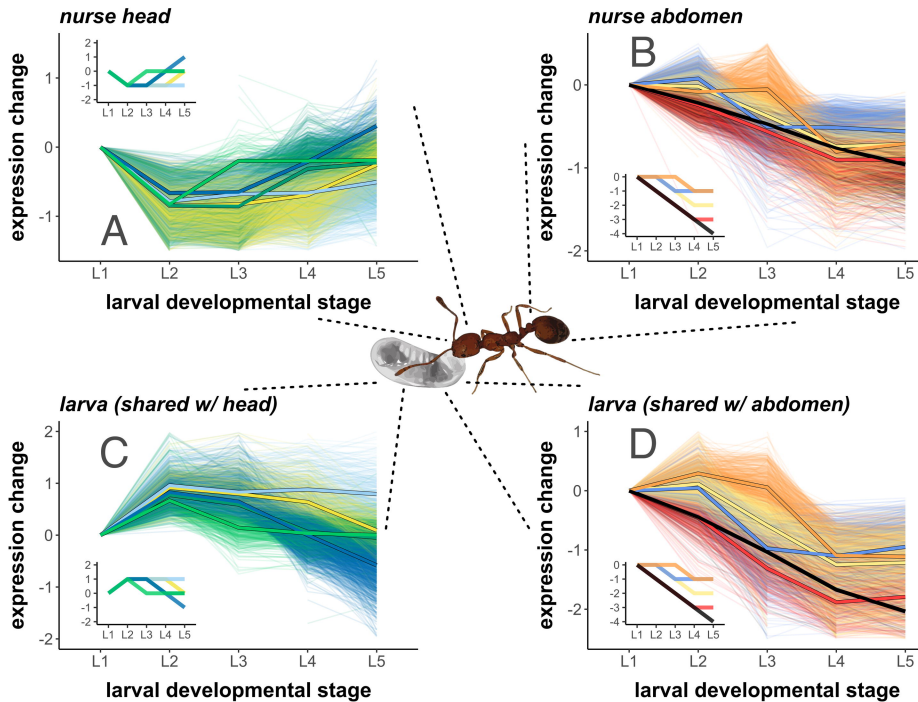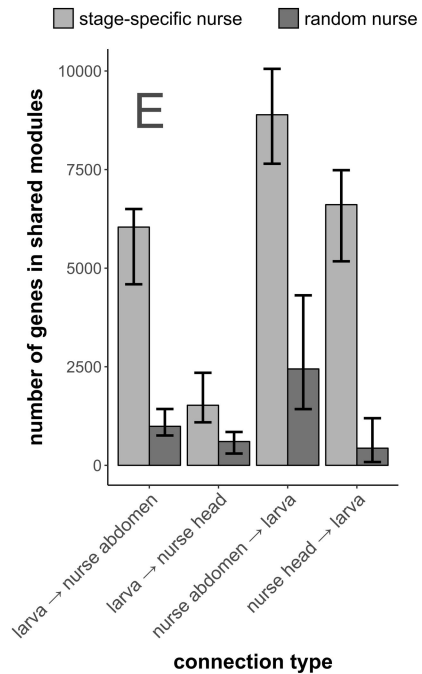

social connectivity

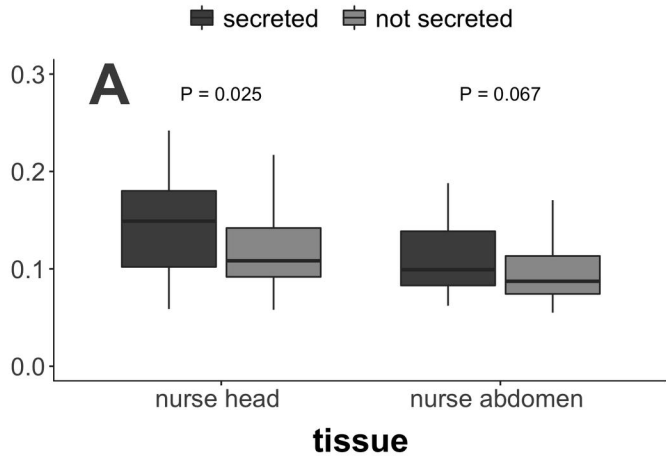

expression

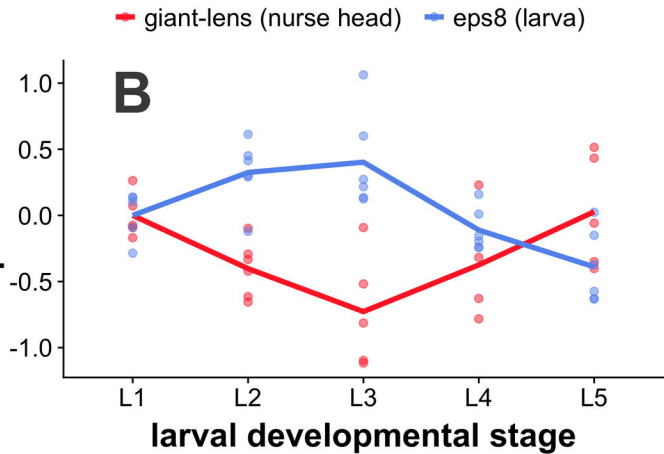

— nurse head — nurse abdomen

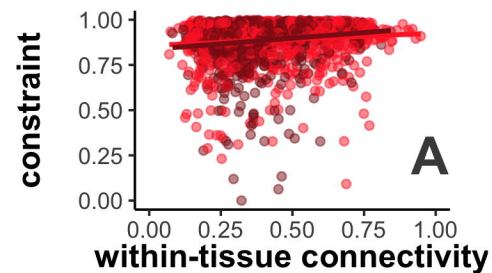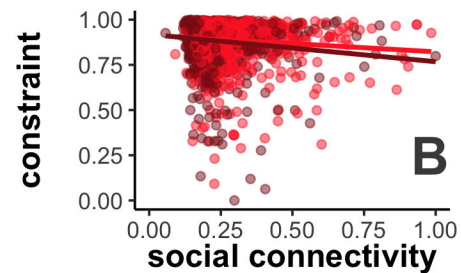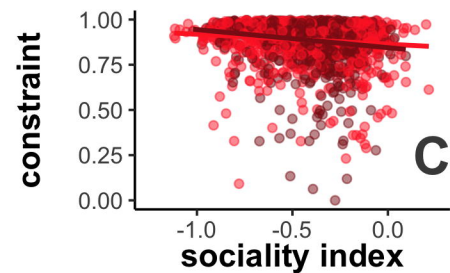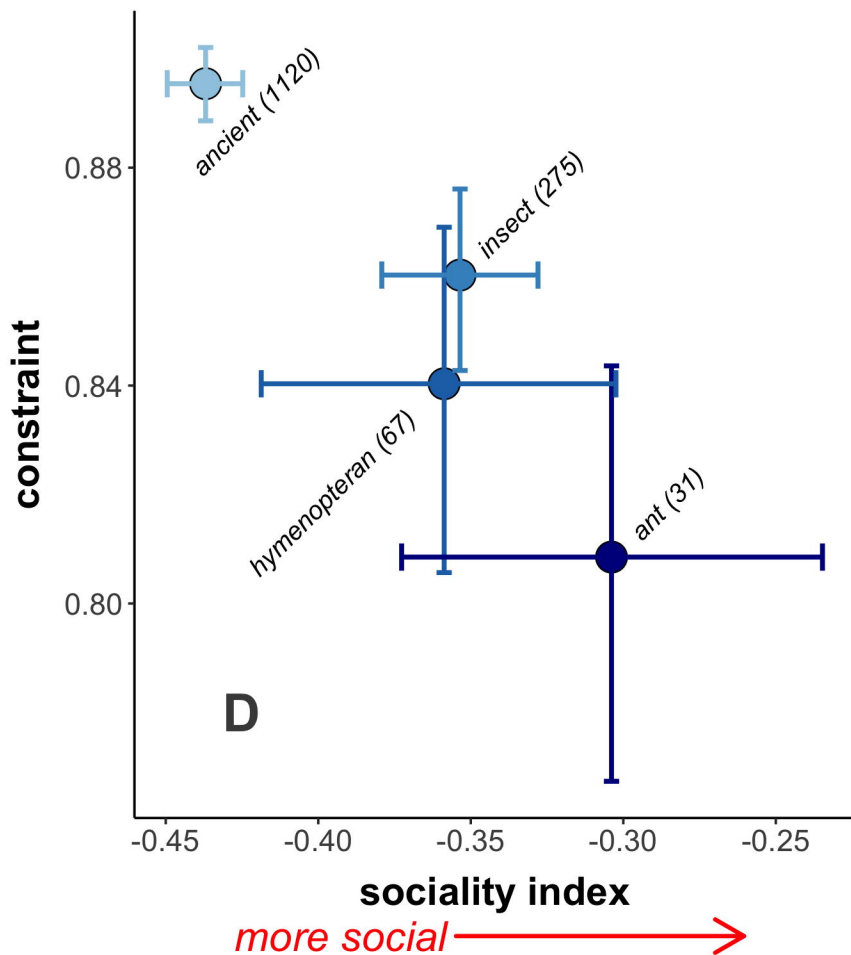

# L1

larvae  
stage-specific nurses  
random nurses

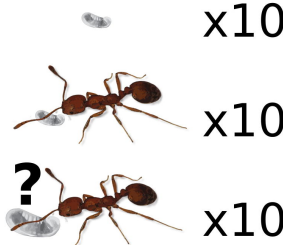

# L2

larvae  
stage-specific nurses  
random nurses

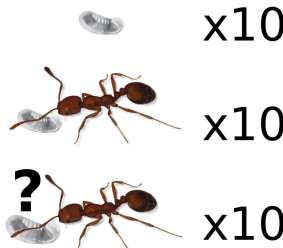

# L3

larvae  
stage-specific nurses  
random nurses

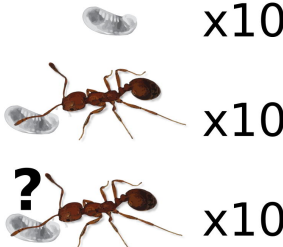

# L4

larvae  
stage-specific nurses  
random nurses

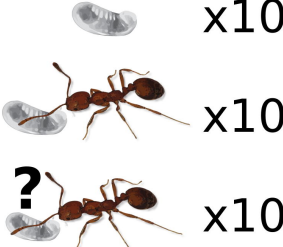

# L5

larvae  
stage-specific nurses  
random nurses

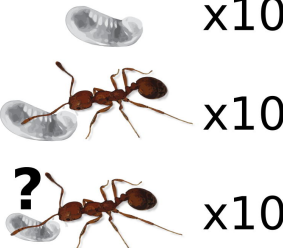

**First:**

define possible expression profiles

| L1    | L2 | L3 | L4 | L5 |
|-------|----|----|----|----|
| 0     | 1  | 2  | 3  | 4  |
| 0     | 1  | 2  | 3  | 3  |
| 0     | 1  | 2  | 2  | 3  |
| ..... |    |    |    |    |
| 0     | -1 | -2 | -3 | -3 |
| 0     | -1 | -2 | -3 | -4 |

calculate true genes' expression profiles

sort genes into modules

make stage-permuted expression profiles

sort genes into modules

calculate mean number of genes in each module

identify significantly-enriched modules (larvae)

identify significantly-enriched modules (nurse)

identify shared modules

1000 replicates

| L1 | L2 | L3 | L4 | L5 |
|----|----|----|----|----|
| 0  | 1  | 2  | 3  | 4  |
| 0  | 1  | 2  | 1  | 0  |
| 0  | 1  | 0  | -1 | -2 |
| 0  | 0  | -1 | -1 | -2 |
| 0  | 0  | -1 | -2 | -3 |

| L1 | L2 | L3 | L4 | L5 |
|----|----|----|----|----|
| 0  | 1  | 2  | 3  | 4  |
| 0  | 1  | 2  | 1  | 0  |
| 0  | 0  | -1 | -2 | -3 |

| L1 | L2 | L3 | L4 | L5 |
|----|----|----|----|----|
| 0  | 1  | 2  | 3  | 4  |
| 0  | 1  | 2  | 1  | 1  |
| 0  | 1  | 2  | 1  | 0  |
| 0  | 0  | 1  | 2  | 3  |
| 0  | 0  | -1 | -1 | -2 |

## Differential Expression Analysis

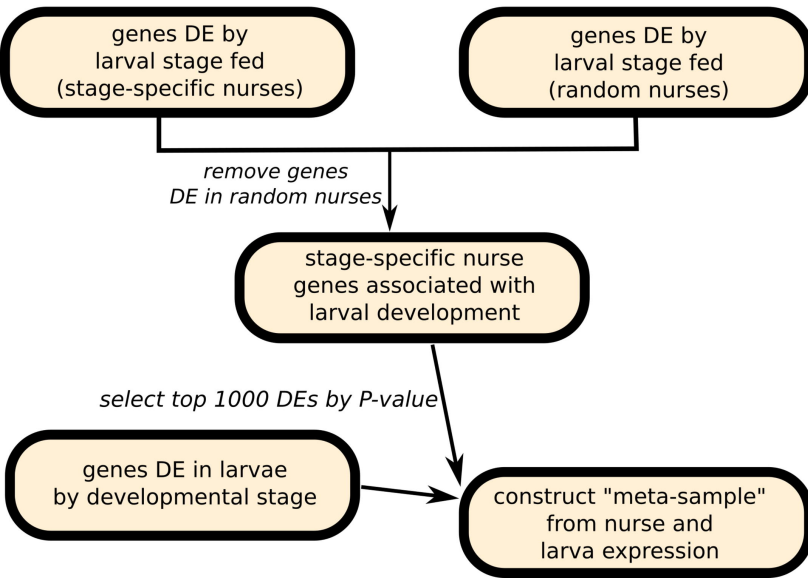

## Gene Regulatory Network Reconstruction

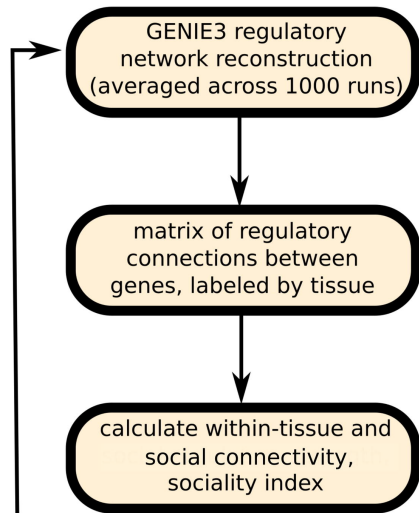

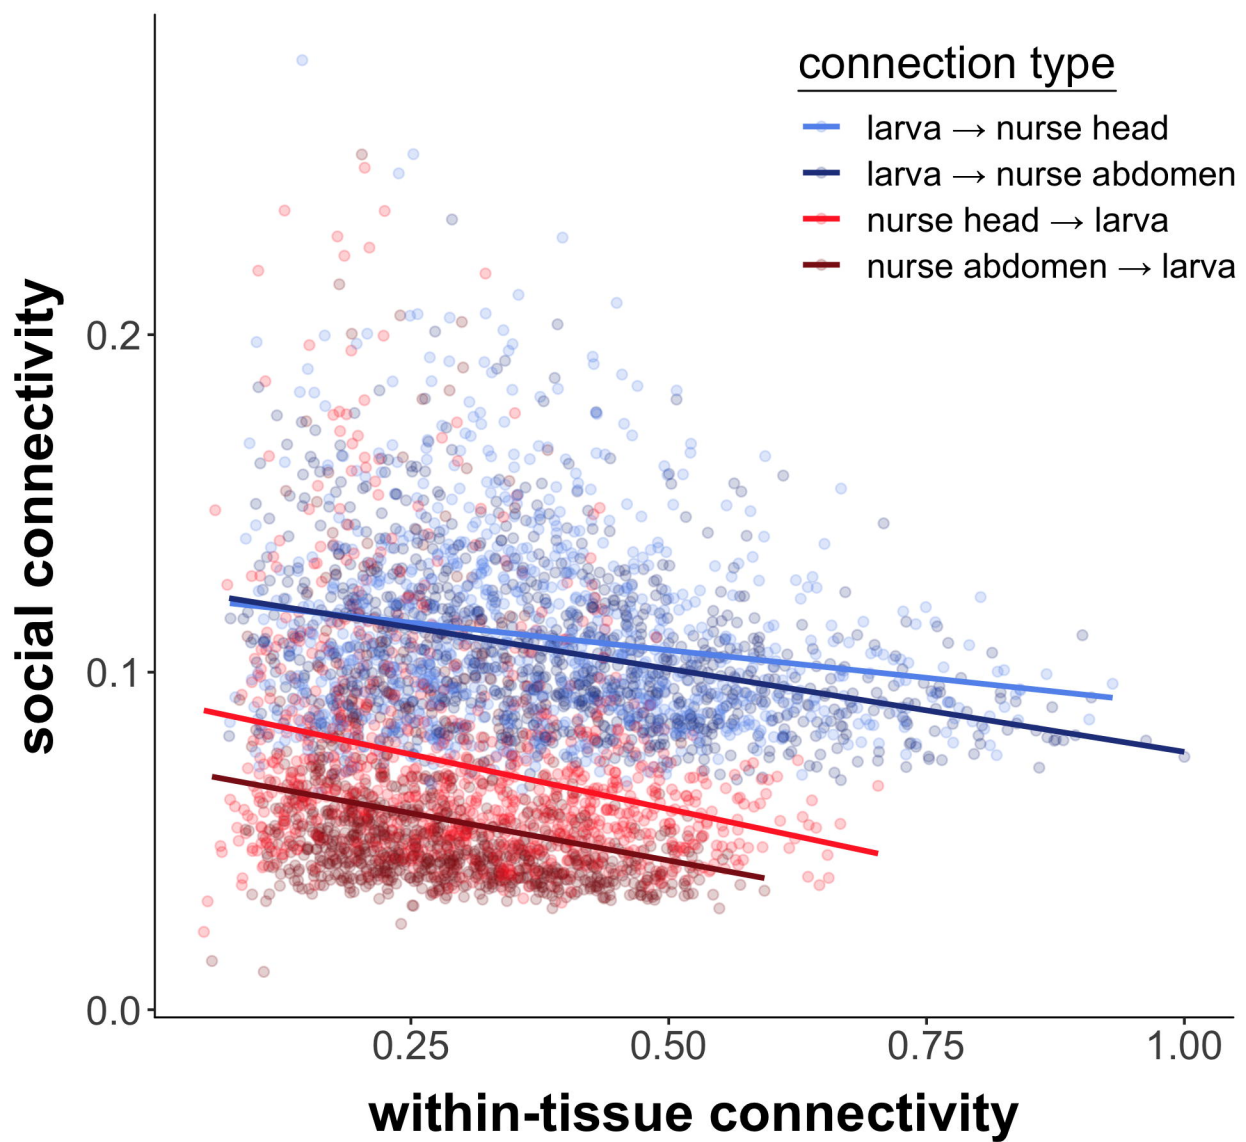

giant-lens (nurse head)    giant-lens (larva)

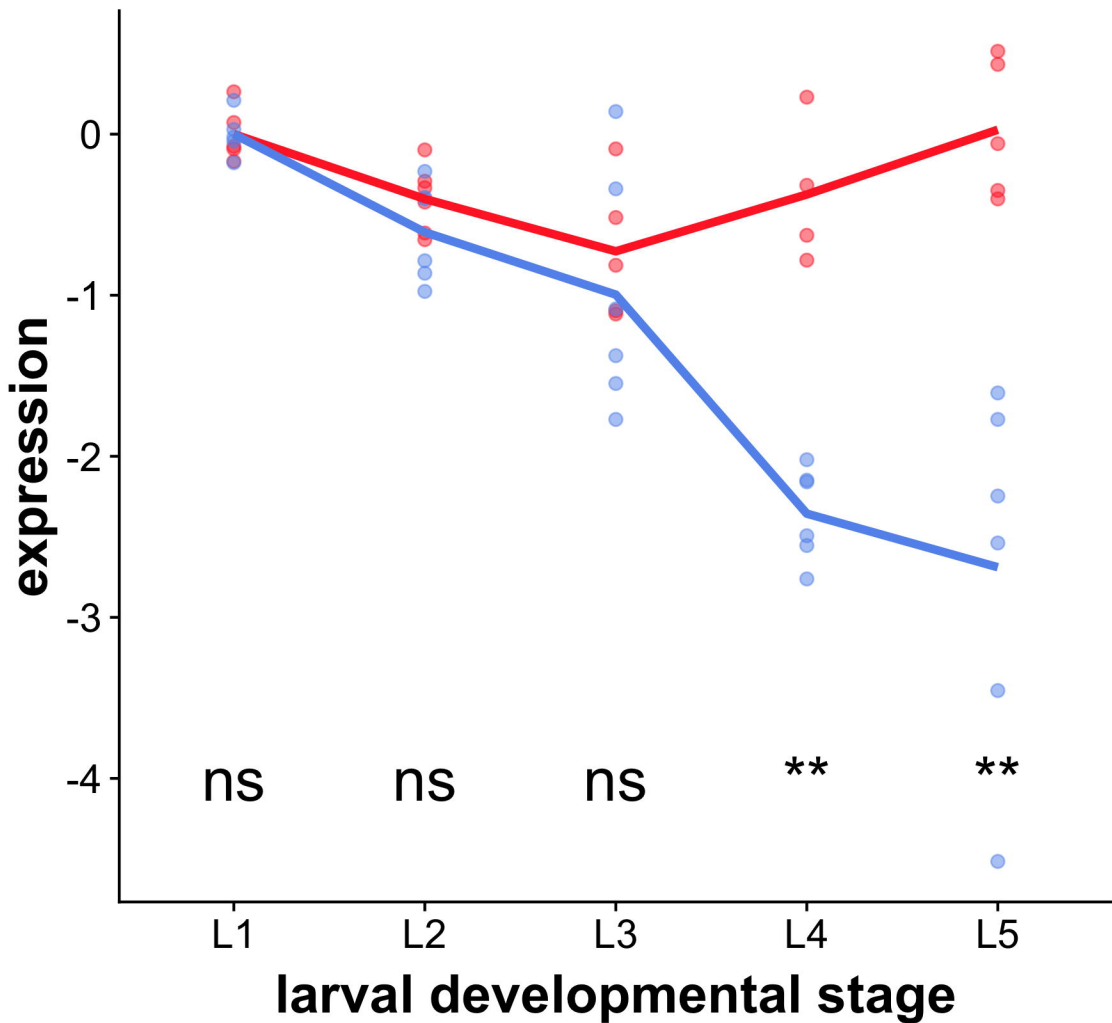



eps8 (sex larva)    eps8 (worker larva)

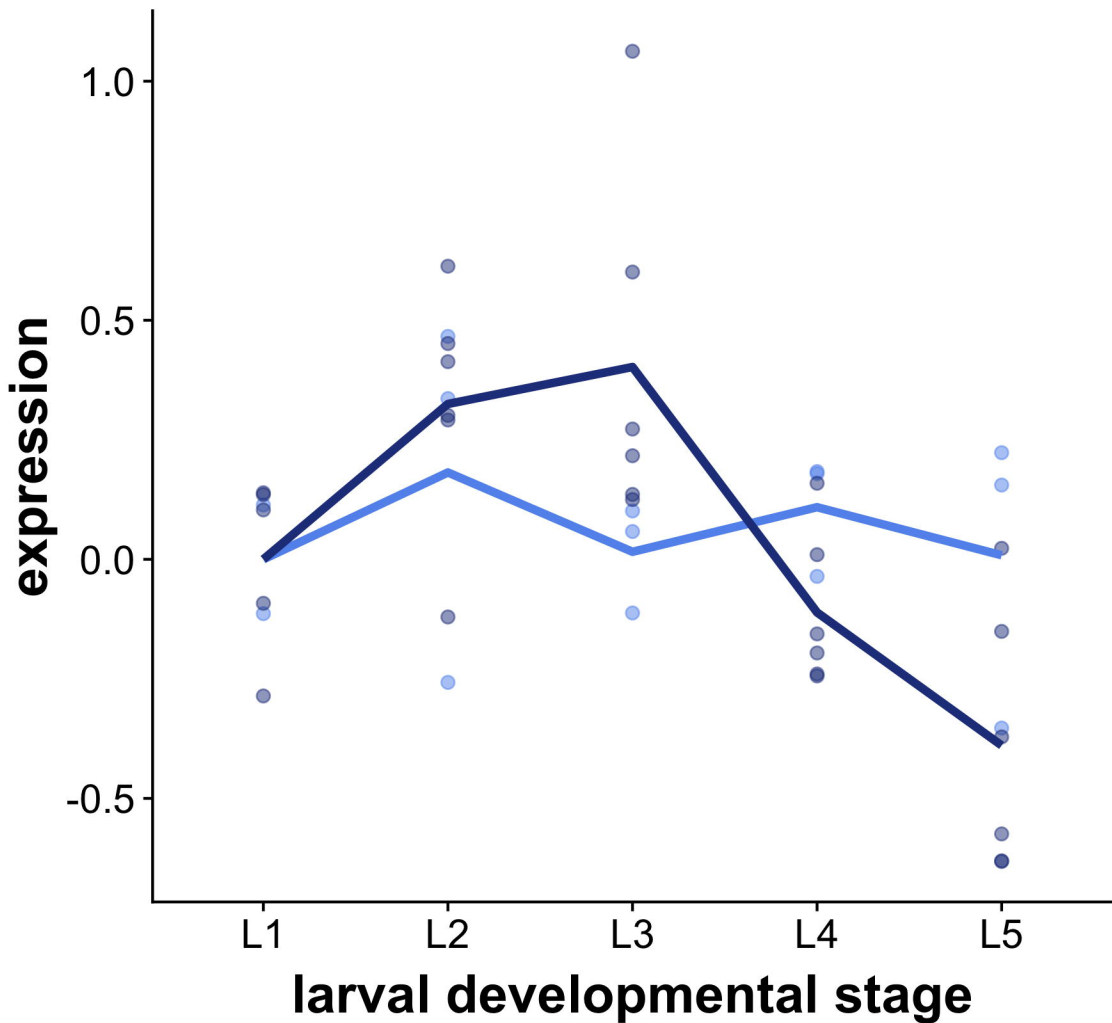

| <b>development stage</b> | <b>sample type</b>           | <b>number of samples</b> |
|--------------------------|------------------------------|--------------------------|
| <b>L1</b>                | larva (W/R)                  | 5                        |
|                          | stage-specific nurse head    | 5                        |
|                          | stage-specific nurse abdomen | 6                        |
|                          | random nurse head            | 3                        |
|                          | random nurse abdomen         | 2                        |
| <b>L2</b>                | larva (W)                    | 6                        |
|                          | larva (R)                    | 3                        |
|                          | stage-specific nurse head    | 6                        |
|                          | stage-specific nurse abdomen | 5                        |
|                          | random nurse head            | 3                        |
|                          | random nurse abdomen         | 3                        |
| <b>L3</b>                | larva (W)                    | 6                        |
|                          | larva (R)                    | 3                        |
|                          | stage-specific nurse head    | 5                        |
|                          | stage-specific nurse abdomen | 6                        |
|                          | random nurse head            | 3                        |
|                          | random nurse abdomen         | 3                        |
| <b>L4</b>                | larva (W)                    | 6                        |
|                          | larva (R)                    | 3                        |
|                          | stage-specific nurse head    | 4                        |
|                          | stage-specific nurse abdomen | 5                        |
|                          | random nurse head            | 2                        |
|                          | random nurse abdomen         | 2                        |
| <b>L5</b>                | larva (W)                    | 6                        |
|                          | larva (R)                    | 3                        |
|                          | stage-specific nurse head    | 5                        |
|                          | stage-specific nurse abdomen | 5                        |
|                          | random nurse head            | 3                        |
|                          | random nurse abdomen         | 3                        |

|                                     | <b>number of significantly-enriched modules</b> | <b>modules positively shared with larvae</b> | <b>modules negatively shared with larvae</b> | <b>number of genes in shared modules</b> |
|-------------------------------------|-------------------------------------------------|----------------------------------------------|----------------------------------------------|------------------------------------------|
| <i>stage-specific nurse head</i>    | 9                                               | 0                                            | 5                                            | 6838                                     |
| <i>random nurse head</i>            | 9                                               | 0                                            | 2                                            | 209                                      |
| <i>stage-specific nurse abdomen</i> | 21                                              | 13                                           | 4                                            | 7943                                     |
| <i>random nurse abdomen</i>         | 10                                              | 0                                            | 1                                            | 1400                                     |

| <b>GO.ID</b> | <b>Term</b>                                            | <b>Annotated</b> | <b>Significant</b> | <b>Expected</b> | <b>P-value</b> |
|--------------|--------------------------------------------------------|------------------|--------------------|-----------------|----------------|
| GO:0044710   | single-organism metabolic process                      | 81               | 14                 | 7.82            | 0.00011        |
| GO:0055114   | oxidation-reduction process                            | 45               | 11                 | 4.35            | 0.00230        |
| GO:0019637   | organophosphate metabolic process                      | 18               | 1                  | 1.74            | 0.00506        |
| GO:0044711   | single-organism biosynthetic process                   | 18               | 0                  | 1.74            | 0.00506        |
| GO:0006629   | lipid metabolic process                                | 12               | 2                  | 1.16            | 0.00565        |
| GO:0009117   | nucleotide metabolic process                           | 14               | 0                  | 1.35            | 0.00755        |
| GO:0006812   | cation transport                                       | 18               | 2                  | 1.74            | 0.00781        |
| GO:0015672   | monovalent inorganic cation transport                  | 11               | 1                  | 1.06            | 0.00898        |
| GO:0090407   | organophosphate biosynthetic process                   | 11               | 0                  | 1.06            | 0.01033        |
| GO:0055086   | nucleobase-containing small molecule metabolic process | 16               | 0                  | 1.55            | 0.01156        |

| <b>GO.ID</b> | <b>Term</b>                 | <b>Annotated</b> | <b>Significant</b> | <b>Expected</b> | <b>P-value</b> |
|--------------|-----------------------------|------------------|--------------------|-----------------|----------------|
| GO:0055114   | oxidation-reduction process | 52               | 7                  | 4.96            | 0.022          |
| GO:0008152   | metabolic process           | 246              | 25                 | 23.46           | 0.033          |

| Gene         | estimated regulatory direction | social connectivity | SwissProt ID                                                   |
|--------------|--------------------------------|---------------------|----------------------------------------------------------------|
| LOC105833299 | nurse abdomen → larva          | 0.464               | 5'-nucleotidase domain-containing protein 1                    |
| LOC105838526 | nurse head → larva             | 0.456               | 1 5-anhydro-D-fructose reductase                               |
| LOC105828583 | nurse head → larva             | 0.433               | Glycerol-3-phosphate dehydrogenase NAD( ) cytoplasmic          |
| LOC105835488 | nurse head → larva             | 0.433               | Myosin regulatory light chain 2                                |
| LOC105837148 | nurse head → larva             | 0.419               | Short-chain dehydrogenase/reductase family 16C member 6        |
| LOC105828656 | nurse head → larva             | 0.413               | N-acetyltransferase 6                                          |
| LOC105837075 | nurse head → larva             | 0.409               | Hemolymph lipopolysaccharide-binding protein                   |
| LOC105834708 | nurse head → larva             | 0.401               | Glucose dehydrogenase FAD quinone                              |
| LOC105836140 | nurse head → larva             | 0.399               | Ankyrin-2                                                      |
| LOC105832040 | nurse abdomen → larva          | 0.393               | -                                                              |
| LOC105834910 | nurse abdomen → larva          | 0.376               | Pyruvate dehydrogenase E1 component subunit beta mitochondrial |
| LOC105835497 | nurse abdomen → larva          | 0.373               | Phenoloxidase 2                                                |
| LOC105836690 | nurse abdomen → larva          | 0.366               | -                                                              |
| LOC105836193 | nurse head → larva             | 0.365               | -                                                              |
| LOC105833826 | nurse head → larva             | 0.360               | Probable tubulin polyglutamylase TTL2                          |
| LOC105833938 | nurse head → larva             | 0.357               | -                                                              |
| LOC105836189 | nurse abdomen → larva          | 0.348               | Venom metalloproteinase 3                                      |
| LOC105829511 | nurse head → larva             | 0.341               | La-related protein 1                                           |
| LOC105840715 | nurse abdomen → larva          | 0.336               | -                                                              |
| LOC105833984 | nurse abdomen → larva          | 0.331               | Procollagen-lysine 2-oxoglutarate 5-dioxygenase 3              |

### nurse head

Basement membrane-specific heparan sulfate proteoglycan core protein

Collagen alpha-1(IV) chain

Spondin-1

Serine proteinase stubble

Angiotensin-converting enzyme (Fragment)

Thrombospondin-4

Protein giant-lens

Protein lev-9

Papilin

Glypican-6

### nurse abdomen

Procollagen-lysine 2-oxoglutarate 5-dioxygenase 3

Collagen alpha-1(IV) chain

Tubulointerstitial nephritis antigen-like

Papilin

Semaphorin-2A

Transferrin

Basement membrane-specific heparan sulfate proteoglycan core protein

Protein NPC2 homolog

Testican-2

Lysozyme
